# Supplementary material
Source: PubMed Central journal article supplement (PMC7894677)
Supplement: ASN.20200608978SupplementaryData.pdf [file ASN.20200608978SupplementaryData.pdf]

## Supplemental Appendix

AKI Treated with Renal Replacement Therapy in Critically Ill Patients with COVID-19

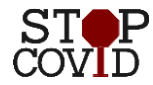

Study of the Treatment and Outcomes in critically ill  
Patients with COVID-19

## Table of Contents

|                                                                                                                                    |              |
|------------------------------------------------------------------------------------------------------------------------------------|--------------|
| <b>STOP-COVID Investigators</b> .....                                                                                              | <b>3-5</b>   |
| <b>Supplemental Methods</b> .....                                                                                                  | <b>6-8</b>   |
| <b>Supplemental Tables</b> .....                                                                                                   | <b>9-20</b>  |
| Supplemental Table 1. List of Participating Sites.....                                                                             | 9            |
| Supplemental Table 2. Definitions of Baseline Characteristics, Comorbidities, Treatments, and Outcomes .....                       | 10-11        |
| Supplemental Table 3. Complete List of Patient Characteristics According to AKI Stage.....                                         | 12-13        |
| Supplemental Table 4. Characteristics of Patients with AKI-RRT on Days 1 and 2 Versus Days 3 Through 14.....                       | 14           |
| Supplemental Table 5. Multivariable Model for AKI-RRT, Accounting for Clustering .....                                             | 15           |
| Supplemental Table 6. Multivariable Model for AKI-RRT among Patients with a Pre-Hospital Baseline Serum Creatinine Available ..... | 16           |
| Supplemental Table 7. Multivariable Model for AKI-RRT Excluding Patients Transferred from an Outside Hospital .....                | 17           |
| Supplemental Table 8. Multivariable Model for AKI-RRT Among Patients who Survived 14 Days.....                                     | 18           |
| Supplemental Table 9. Multivariable Model for 28-Day Mortality from the Day of RRT Initiation.....                                 | 19           |
| Supplemental Table 10. AKI by Stage and 28-Day Mortality Among Patients with a Pre-Hospital Baseline SCr Available.....            | 20           |
| <b>Supplemental Figures</b> .....                                                                                                  | <b>21-27</b> |
| Supplemental Figure 1. Number of Patients with AKI-RRT by State among Contributing Sites. ....                                     | 21           |
| Supplemental Figure 2. Time to AKI-RRT .....                                                                                       | 22           |
| Supplemental Figure 3. Timing of AKI-RRT in Relation to Intubation.....                                                            | 23           |
| Supplemental Figure 4. Proportion of Patients with AKI Stage 3 Treated with RRT by Quartile of Regional Density of COVID-19.....   | 24           |
| Supplemental Figure 5. 28-Day Mortality of Patients with AKI-RRT by Region.....                                                    | 25           |
| Supplemental Figure 6. AKI on Hospital Admission and within 14 Days following ICU Admission.....                                   | 26           |
| Supplemental Figure 7. Flowchart of Outcomes of Patients without AKI-RRT.....                                                      | 27           |
| <b>Acknowledgement of Patient Overlap</b> .....                                                                                    | <b>28</b>    |

## **STOP-COVID INVESTIGATORS**

**Baylor College of Medicine:** Carl P. Walther\*, Samaya J. Anumudu

**Baylor University Medical Center:** Justin Arunthamakun\*, Kathleen F. Kopecky, Gregory P. Milligan, Peter A. McCullough, Thuy-Duyen Nguyen

**Beth Israel Deaconess Medical Center:** Shahzad Shaefi\*, Megan L. Krajewski, Sidharth Shankar, Aameeka Pannu, Juan D. Valencia

**Boston Medical Center:** Sushrut S. Waikar\*, Zoe A. Kibbelaar

**Cook County Health:** Ambarish M. Athavale\*, Peter Hart, Shristi Upadhyay, Ishaan Vohra

**Cooper University Health Care:** Adam Green\*, Jean-Sebastien Rachoin, Christa A. Schorr, Lisa Shea

**Duke University Medical Center:** Daniel L. Edmonston\*, Christopher L. Mosher

**Hackensack Meridian Health Mountainside Medical Center:** Alexandre M. Shehata\*, Zaza Cohen, Valerie Allusson, Gabriela Bambrick-Santoyo, Noor ul aain Bhatti, Bijal Mehta, Aquino Williams

**Hackensack Meridian Health Hackensack University Medical Center:** Samantha K. Brenner\*, Patricia Walters, Ronaldo C. Go, Keith M. Rose

**Harvard University:** Rebecca Lisk, Amy M. Zhou, Ethan C. Kim

**Icahn School of Medicine at Mount Sinai:** Lili Chan\*, Kusum S. Mathews\*, Steven G. Coca, Deena R. Altman, Aparna Saha, Howard Soh, Huei Hsun Wen, Sonali Bose, Emily A. Leven, Jing G. Wang, Gohar Mosoyan, Girish N. Nadkarni, Pattharawin Pattharanitima, Emily J. Gallagher

**Indiana University School of Medicine/Indiana University Health:** Allon N. Friedman\*, John Guirguis, Rajat Kapoor, Christopher Meshberger, Katherine J. Kelly

**Johns Hopkins Hospital:** Chirag R. Parikh\*, Brian T. Garibaldi, Celia P. Corona-Villalobos, Yumeng Wen, Steven Menez, Rubab F. Malik, Elena Cervantes, Samir Gautam

**Kings County Hospital Center:** Mary C. Mallappallil\*, Jie Ouyang, Sabu John, Ernie Yap, Yohannes Melaku, Ibrahim Mohamed, Siddhartha Bajracharya, Isha Puri, Mariah Thaxton, Jyotsna Bhattacharya, John Wagner, Leon Boudourakis

**Loma Linda University:** H. Bryant Nguyen\*, Afshin Ahoumim

**Mayo Clinic, Arizona:** Leslie F. Thomas\*, Dheeraj Reddy Sirganagari

**Mayo Clinic, Florida:** Pramod K. Guru\*

**Medical College of Wisconsin:** Yan Zhou,\* Paul A. Bergl, Jesus Rodriguez, Jatan A. Shah, Mrigank S. Gupta

**MedStar Georgetown University Hospital:** Princy N. Kumar\*, Deepa G. Lazarous, Seble G. Kassaye

**Montefiore Medical Center/Albert Einstein College of Medicine:** Michal L. Melamed\*, Tanya S. Johns. Ryan Mocerino, Kalyan Prudhvi, Denzel Zhu, Rebecca V. Levy, Yorg Azzi, Molly Fisher, Milagros Yunes, Kaltrina Sedaliu, Ladan Golestaneh, Maureen Brogan, Neelja Kumar, Michael Chang, Jyotsana Thakkar

**New York-Presbyterian Queens Hospital:** Ritesh Raichoudhury\*, Akshay Athreya, Mohamed Farag

**New York-Presbyterian/Weill Cornell Medical Center:** Edward J. Schenck\*, Soo Jung Cho, Maria Plataki, Sergio L. Alvarez-Mulett, Luis G. Gomez-Escobar, Di Pan, Stefi Lee, Jamuna Krishnan, William Whalen

**New York University Langone Hospital:** David Charytan\*, Ashley Macina, Sobaata Chaudhry, Benjamin Wu, Frank Modersitzki

**Northeastern University:** Amey Bhivshet

**Northwestern Memorial Hospital:** Northwestern University Feinberg School of Medicine - Anand Srivastava\*, Alexander S. Leidner, Carlos Martinez, Jacqueline M. Kruser, Richard G. Wunderink, Alexander J. Hodakowski

**Ochsner Medical Center:** Juan Carlos Q. Velez\*, Eboni G. Price-Haywood, Luis A. Matute-Trochez, Anna E. Hasty, Muner MB. Mohamed

**Oregon Health and Science University Hospital:** Rupali S. Avasare\*, David Zonies\*

**Partners Healthcare:** Brigham and Women's Hospital, Brigham and Women's Faulkner Hospital, Massachusetts General Hospital, and Newton Wellesley Hospital - David E. Leaf\*, Shruti Gupta\*, Meghan E. Sise, Erik T. Newman, Samah Abu Omar, Kapil K. Pokharel, Shreyak Sharma, Harkarandeep Singh, Simon Correa, Tanveer Shaikat, Omer Kamal, Wei Wang, Heather Yang, Jeffery O. Boateng, Meghan Lee, Ian A. Strohhahn, Jiahua Li, Ariel L. Mueller

**ProMedica Health System:** Roberta Redfern\*, Nicholas S. Cairl, Gabriel Naimy, Abeer Abu-Saif, Danyell Hall, Laura Bickley

**Renown Health:** Chris Rowan\*, Farah Madhai-Lovely\*

**Rush University Medical Center:** Vasil Peev\*, Jochen Reiser, John J. Byun, Andrew Vissing, Esha M. Kapania, Zoe Post, Nilam P. Patel, Joy-Marie Hermes

**Rutgers/New Jersey Medical School:** Anne K. Sutherland\*, Ameer Patrawalla, Diana G. Finkel, Barbara A. Danek, Sowminya Arikapudi, Jeffrey M. Paer, Peter Cangialosi, Mark Liotta

**Rutgers/Robert Wood Johnson Medical School:** Jared Radbel\*, Sonika Puri, Jag Sunderram, Matthew T. Scharf, Ayesha Ahmed, Ilya Berim, Jayanth S. Watson

**Stanford Healthcare:** Stanford University School of Medicine – Shuchi Anand\*, Joseph E. Levitt, Pablo Garcia

**Temple University Hospital:** Suzanne M. Boyle\*, Rui Song, Ali Arif

**Thomas Jefferson Health:** Jingjing Zhang\*, Sang Hoon Woo, Xiaoying Deng, Goni Katz-Greenberg, Katharine Senter

**Tulane Medical Center:** Moh'd A. Sharshir\*, Vadym V. Rusnak

**United Health Services Hospitals:** Muhammad Imran Ali, Terri Peters, Kathy Hughes

**University of Colorado Anschutz Medical Campus:** Anip Bansal\*, Amber S. Podoll, Michel Chonchol, Sunita Sharma, Ellen L. Burnham

**University Hospitals Cleveland Medical Center:** Arash Rashidi\*, Rana Hejal

**University of Alabama-Birmingham Hospital:** Eric Judd\*, Laura Latta, Ashita Tolwani

**University of California-Davis Medical Center:** Timothy E. Albertson\*, Jason Y. Adams

**University of California-Los Angeles Medical Center:** Ronald Reagan-UCLA Medical Center - Steven Y. Chang\*, Rebecca M. Beutler; Santa Monica-UCLA Medical Center – Carl E. Schulze

**University of California-San Diego Medical Center:** Etienne Macedo\*, Harin Rhee

**University of California-San Francisco Medical Center:** Kathleen D. Liu\*, Vasantha K. Jotwani

**University of Chicago Medical Center:** Jay L. Koyner\*

**University of Florida Health-Gainesville:** Chintan V. Shah\*

**University of Florida-Health-Jacksonville:** Vishal Jaikaransingh\*

**University of Illinois Hospital and Health Sciences System:** Stephanie M. Toth-Manikowski\*, Min J. Joo\*, James P. Lash

**University of Kentucky Medical Center:** Javier A. Neyra\*, Nourhan Chaaban, Yahya Ahmad, Madona Elias

**University Medical Center of Southern Nevada:** Alfredo Iardino, Elizabeth H. Au, Jill H. Sharma

**University of Miami Health System:** Marie Anne Sosa\*, Sabrina Taldone, Gabriel Contreras, David De La Zerda, Alessia Fornoni, Hayley B. Gershengorn

**University of Michigan:** Salim S. Hayek\*, Penelope Blakely, Hanna Berlin, Tariq U. Azam, Husam Shadid, Michael Pan, Patrick O' Hayer, Chelsea Meloche, Rafeeq Feroze, Kishan J. Padalia, Abbas Bitar, Elizabeth Anderson, John P. Donnelly, Andrew J. Admon

**University of North Carolina School of Medicine:** Jennifer E. Flythe\*, Matthew J. Tugman, Emily H. Chang

**University of Oklahoma Health Sciences Center:** Brent R. Brown\*

**University of Pennsylvania Health System:** Amanda K. Leonberg-Yoo\*, Ryan C. Spiardi, Todd A. Miano, Meaghan S. Roche, Charles R. Vasquez

**University of Pittsburgh Medical Center:** Amar D. Bansal\*, Natalie C. Ernecoff, Sanjana Kapoor, Siddharth Verma, Huiwen Chen

**University of Tennessee Health Science Center and Memphis VA Medical Center/Methodist University Hospital –** Csaba P. Kovesdy\*, Miklos Z. Molnar\*, Ambreen Azhar

**University of Texas Southwestern Medical Center and Parkland Health and Hospital System:** S. Susan Hedayati\*, Mridula V. Nadamuni, Shani Shastri, Duwayne L. Willett

**University of Vermont Larner College of Medicine:** Samuel A.P. Short

**University of Virginia Health System:** Amanda D. Renaghan\*, Kyle B. Enfield

**University of Washington Medical Center:** Pavan K. Bhatraju\*, A. Bilal Malik

**Vanderbilt University Medical Center:** Matthew W. Semler

**Washington University in St. Louis/Barnes Jewish Hospital:** Anitha Vijayan\*, Christina Mariyam Joy, Tingting Li, Seth Goldberg, Patricia F. Kao

**Wellforce Health System:** Lowell General Hospital - Greg L. Schumaker\*, Tufts Medical Center - Nitender Goyal\*, Anthony J. Faugno, Greg L. Schumaker, Caroline M. Hsu, Asma Tariq, Leah Meyer, Ravi K. Kshirsagar, Daniel E. Weiner

**Westchester Medical Center:** Marta Christov\*, Jennifer Griffiths, Sanjeev Gupta, Aromma Kapoor

**Yale School of Medicine:** Perry Wilson\*, Tanim Arora, Ugochukwu Ugwuowo

\*Site Principal Investigator

## SUPPLEMENTAL METHODS

### Data Collection and Validation

Data were collected by both medical doctors and research coordinators and were entered into a secure, HIPAA-compliant, web-based application (REDCap). Wherever possible, data were captured using checkboxes rather than manual entry to minimize keystroke errors. For data that required keystroke entry (e.g., laboratory values), we implemented validation ranges to flag potential errors in real-time. We also implemented automated data validation rules to flag errors in dates (e.g., if the date of death was entered as being before the date of ICU admission). Finally, all data were manually reviewed, and values that appeared incongruent or out of range were manually validated by confirming the accuracy of the data with the collaborator who entered it.

### Definition of an ICU Patient

Patients were considered to have been admitted to an ICU if they were either admitted to a regular ICU room or if they were in a non-ICU room that was functioning as an ICU room for surge capacity. Non-ICU rooms were considered to be functioning as an ICU room under any of the following conditions: 1) the patient was being treated by an ICU team; 2) the patient was receiving invasive mechanical ventilation or extracorporeal membrane oxygenation; 3) the patient was receiving continuous renal replacement therapy; or 4) the patient was receiving vasopressors/inotropes or mechanical cardiac support (e.g., ventricular assist device) in a room where this would traditionally not be permitted. Of the 3099 patients, 21 (0.7%) were admitted to a non-ICU bed for surge capacity.

### Sensitivity Analysis of 28-day mortality in patients discharged from the hospital prior to 28 days

In a subset of 50 patients who had been admitted to one of six hospitals in Boston, MA, and who had been discharged prior to 28 days, we manually reviewed their charts or called them to ascertain their 28-day survival status. Among 50 patients reviewed, all 50 remained alive at 28 days.

### Multivariable Modeling of AKI-RRT

We performed multivariable logistic regression modeling to estimate the association between patient- and hospital-level covariates and the primary outcome of acute kidney injury treated with renal replacement therapy (AKI-RRT) within 14 days following ICU admission. We prespecified the variables below for inclusion in the multivariable model based on clinical knowledge, biologic plausibility, and completeness of data. For laboratory and physiologic data, we selected the worst value on ICU day 1 or 2 to minimize the degree of missingness.

1. Age (years): 18-39; 40-49; 50-59; 60-69; 70-79;  $\geq 80$
2. Sex: male vs. female
3. Race: White vs. Non-White
4. Hypertension
5. Diabetes mellitus
6. Body mass index ( $\text{kg}/\text{m}^2$ ):  $<25$ ; 25-29; 30-34; 35-39.9;  $\geq 40$
7. Chronic kidney disease (CKD): no CKD (estimated glomerular filtration rate [eGFR]  $\geq 60$   $\text{ml}/\text{min}/1.73\text{m}^2$ ); CKD stage III (eGFR 30-59  $\text{ml}/\text{min}/1.73\text{m}^2$ ); CKD stages IV and V (eGFR  $<30$   $\text{ml}/\text{min}/1.73\text{m}^2$ )
8. Coronary artery disease
9. Congestive heart failure
10. Active malignancy
11. Days from hospital to ICU admission:  $\leq 3$  vs.  $>3$
12. Lymphocyte count (per  $\text{mm}^3$ ) (lowest value on ICU day 1 or 2):  $<1000$  vs.  $\geq 1000$  per  $\text{mm}^3$
13. Liver and Coagulation components of the Sequential Organ Failure Assessment (SOFA) score:

|                                                       | Categories |         |           |
|-------------------------------------------------------|------------|---------|-----------|
|                                                       | 0          | 1       | 2-4*      |
| SOFA Liver (Bilirubin, mg/dl)                         | $<1.2$     | 1.2-1.9 | $\geq 2$  |
| SOFA Coagulation (Platelets, $\text{K}/\text{mm}^3$ ) | $\geq 150$ | 100-149 | $\leq 99$ |

\*Categories 2, 3, and 4 of the liver and coagulation components of the SOFA score were binned due to low frequency of events in categories "3" and "4".

14. PaO<sub>2</sub>:FiO<sub>2</sub> ratio (lowest value on ICU day 1 or day 2): not mechanically ventilated; mechanically ventilated and PaO<sub>2</sub>:FiO<sub>2</sub> ratio ≥200; mechanically ventilated and PaO<sub>2</sub>:FiO<sub>2</sub> ratio 100-199; mechanically ventilated and PaO<sub>2</sub>:FiO<sub>2</sub> ratio <100
15. Secondary infection on ICU day 1: confirmed or suspected infection(s) on ICU Day 1 other than COVID-19, including bacterial pneumonia (must have a positive blood or sputum culture, or a positive urine antigen for pneumococcus or legionella, or a new infiltrate on chest imaging suspected to be separate from COVID-related pneumonia), viral respiratory infection (e.g., influenza, parainfluenza, and RSV), biliary sepsis, cellulitis, bacteremia or endocarditis (only if confirmed by blood cultures and/or cardiac imaging), or other
16. Altered mental status on ICU day 1 (for patients who are intubated/sedated, the most recent exam prior to intubation/sedation was used)
17. Shock, defined as the requirement for ≥2 vasopressors
18. D-dimer (ng/ml) (highest value on ICU day 1 or 2): <1000; 1000-2500; >2500
19. Hospital size (number of ICU beds, not including surge capacity): ≥100, 50-99, <50
20. Regional density of COVID-19, assessed by categorizing hospitals into quartiles according to the regional (county) density of COVID-19 positive cases present on the median date of ICU admission for each site. Specifically, we calculated the number of COVID-19 cases per 100,000 population in the county in which each of the participating hospitals is located. We then categorized hospitals according to quartiles of the density of COVID-19 cases.

Multivariable modeling was performed using logistic regression for the binary outcome of AKI-RRT within 14 days of ICU admission. Odds ratios and confidence intervals are reported. Missing data were not imputed. Rather, we created a separate missing category for each covariate that had missing data, since data may not have been missing at random. Further, the missingness of a variable could have clinical relevance (e.g., a healthier patient may not have certain physiologic or laboratory values assessed as frequently), which could affect treatment decisions.

### Multivariable Modeling of 28-Day Mortality among Patients with AKI-RRT

We also examined independent predictors of 28-day mortality among patients with AKI-RRT using the following covariates, selected based on clinical knowledge and previously published data.<sup>1</sup> For physiologic and acute severity-of-illness covariates, unless otherwise specified we used the value on the day of RRT initiation. If unavailable, we used the value from the day prior.

1. Age (years): 18-39; 40-49; 50-59; 60-69; 70-79; ≥80
2. Sex: male vs. female
3. Race: White vs. Non-White
4. Hypertension
5. Diabetes mellitus
6. Body mass index (kg/m<sup>2</sup>): <25; 25-29; 30-34; 35-39.9; ≥40
7. Chronic kidney disease (CKD): no CKD (estimated glomerular filtration rate [eGFR] ≥60 ml/min/1.73m<sup>2</sup>); CKD stage III (eGFR 30-59 ml/min/1.73m<sup>2</sup>); CKD stages IV and V (eGFR <30 ml/min/1.73m<sup>2</sup>)
8. Coronary artery disease
9. Congestive heart failure
10. Active malignancy
11. Days from hospital admission to ICU admission: ≤3 vs. >3 days
12. PaO<sub>2</sub>:FiO<sub>2</sub> ratio: not mechanically ventilated; mechanically ventilated and PaO<sub>2</sub>:FiO<sub>2</sub> ratio ≥200; mechanically ventilated and PaO<sub>2</sub>:FiO<sub>2</sub> ratio 100-199; mechanically ventilated and PaO<sub>2</sub>:FiO<sub>2</sub> ratio <100
13. Vasopressors: 0, 1, ≥2
14. Urine output (ml/day): >500; 100-500; <100
15. Lymphocyte count (per mm<sup>3</sup>): <1000 vs. ≥1000
16. Liver and Coagulation components of the Sequential Organ Failure Assessment (SOFA) score:

|                                                  | Categories |         |      |
|--------------------------------------------------|------------|---------|------|
|                                                  | 0          | 1       | 2-4* |
| SOFA Liver (Bilirubin, mg/dl)                    | <1.2       | 1.2-1.9 | ≥2   |
| SOFA Coagulation (Platelets, K/mm <sup>3</sup> ) | ≥150       | 100-149 | ≤99  |

\*Categories 2, 3, and 4 of the liver and coagulation components of the SOFA score were binned due to low frequency of events in categories “3” and “4”.

17. Secondary infection on ICU day 1: confirmed or suspected infection(s) on ICU Day 1 other than COVID-19, including bacterial pneumonia (must have a positive blood or sputum culture, or a positive urine antigen for

- pneumococcus or legionella, or a new infiltrate on chest imaging suspected to be separate from COVID-related pneumonia), viral respiratory infection (e.g., influenza, parainfluenza, and RSV), biliary sepsis, cellulitis, bacteremia or endocarditis (only if confirmed by blood cultures and/or cardiac imaging), or other
18. Altered mental status on ICU day 1 (for patients who are intubated/sedated, the most recent exam prior to intubation/sedation was used)
  19. Initial RRT modality: intermittent hemodialysis versus continuous renal replacement therapy for 12-24 hours/day
  20. Hospital size (# ICU beds, not including surge capacity):  $\geq 100$ , 50-99,  $< 50$
  21. Regional density of COVID-19, quartiles

### **Interhospital Variation in AKI-RRT:**

To estimate hospital-specific rates of AKI-RRT, we used multilevel logistic regression modeling with patients nested in hospitals. This approach addresses the poor reliability of estimates stemming from hospitals submitting few cases. Three models were performed: unadjusted, adjusted for patient-level characteristics, and adjusted for both patient- and hospital level characteristics. The patient-level covariates included were the same as those described above in the multivariable model of AKI-RRT. We also included stage 3 AKI (defined as a three-fold or greater increase in serum creatinine [SCr] from baseline) as a covariate to account for varying degrees of AKI severity across hospitals. Hospital-level characteristics included number of ICU beds and regional density of COVID-19, defined above.

### **Assessment of AKI not treated with RRT:**

We categorized AKI severity as stages 1, 2, or 3 according to modified SCr-based definitions established by the Kidney Disease: Improving Global Outcomes criteria<sup>2</sup> (**Supplemental Table 2**). To assess AKI and its severity on hospital admission, we compared the initial SCr value on admission to the pre-hospital baseline value. Accordingly, AKI on hospital admission was only assessed in the subset of patients with a pre-hospital baseline SCr available (44.1% of the cohort). To assess AKI and its severity occurring within 14 days following ICU admission, we compared the highest SCr value achieved within 14 days following ICU admission to the pre-hospital baseline SCr value. If a pre-hospital baseline SCr was not available, we used the SCr value on hospital admission as the baseline.

### **References:**

- <sup>1</sup>Demirjian S, Chertow GM, Zhang JH, et al. Model to predict mortality in critically ill adults with acute kidney injury. *Clin J Am Soc Nephrol* Sep;6(9):2114-20, 2011.
- <sup>2</sup>Kidney Disease; Improving Global Outcomes (KDIGO) Acute Kidney Injury Work Group. KDIGO clinical practice guideline for acute kidney injury. *Kidney Int Suppl* 2, 2012: 1-138.



**Supplemental Table 1. List of Participating Sites**

|                                                                 |
|-----------------------------------------------------------------|
| <b>Northeast</b>                                                |
| Beth Israel Deaconess Medical Center                            |
| Brigham and Women's Faulkner Hospital                           |
| Brigham and Women's Hospital                                    |
| Cooper University Health Care                                   |
| Hackensack Meridian Health Hackensack University Medical Center |
| Hackensack Mountainside Hospital                                |
| Johns Hopkins Hospital                                          |
| Kings County Hospital Center                                    |
| Lowell General Hospital                                         |
| Massachusetts General Hospital                                  |
| MedStar Georgetown University Hospital                          |
| Montefiore Medical Center                                       |
| Mount Sinai                                                     |
| Newton Wellesley Hospital                                       |
| New York-Presbyterian Queens Hospital                           |
| New York-Presbyterian/Weill Cornell Medical Center              |
| New York University Langone Hospital                            |
| Rutgers/New Jersey Medical School                               |
| Rutgers/Robert Wood Johnson Medical School                      |
| Temple University Hospital                                      |
| Thomas Jefferson University Hospital                            |
| Tufts Medical Center                                            |
| United Health Services Hospitals                                |
| University of Pennsylvania Health System                        |
| University of Pittsburgh Medical Center                         |
| Westchester Medical Center                                      |
| Yale University Medical Center                                  |
| <b>South</b>                                                    |
| Baylor College of Medicine, Houston                             |
| Baylor University Medical Center/Baylor Scott White and Health  |
| Duke University Medical Center                                  |
| Mayo Clinic, Florida                                            |
| Memphis VA Medical Center                                       |
| Methodist University Hospital                                   |
| Ochsner Medical Center                                          |
| Tulane Medical Center                                           |
| University of Alabama-Birmingham Hospital                       |
| University of Florida Health-Gainesville                        |
| University of Florida Health-Jacksonville                       |
| University of Miami Health System                               |
| University of North Carolina Hospitals                          |
| University of Texas Southwestern Medical Center                 |
| University of Virginia Health System                            |
| <b>Midwest</b>                                                  |
| Barnes-Jewish Hospital                                          |
| Cook County Health                                              |
| Froedtert Hospital                                              |
| Indiana University Health Methodist Hospital                    |
| Northwestern Memorial Hospital                                  |
| Promedica Health System                                         |
| Rush University Medical Center                                  |
| University Hospitals Cleveland Medical Center                   |
| University of Chicago Medical Center                            |
| University of Illinois Hospital and Health Sciences System      |
| University of Kentucky Hospital                                 |
| University of Michigan Hospital                                 |
| University of Oklahoma Health Sciences Center                   |
| <b>West</b>                                                     |
| Loma Linda University Medical Center                            |
| Mayo Clinic, Arizona                                            |
| Oregon Health and Science University Hospital                   |
| Renown Health                                                   |
| Stanford Healthcare                                             |
| University of California-Davis Medical Center                   |
| University of California-Los Angeles Medical Center             |
| University of California-San Diego Medical Center               |
| University of California-San Francisco Medical Center           |
| UCHealth University of Colorado                                 |
| University Medical Center of Southern Nevada                    |
| University of Washington Medical Center                         |

**Supplemental Table 2. Definitions of Baseline Characteristics, Comorbidities, Treatments, and Outcomes**

|                                            |                                                                                                                                                                                                                                                                                                                                                                                                                                                                                                                    |
|--------------------------------------------|--------------------------------------------------------------------------------------------------------------------------------------------------------------------------------------------------------------------------------------------------------------------------------------------------------------------------------------------------------------------------------------------------------------------------------------------------------------------------------------------------------------------|
| <b>Baseline Characteristics</b>            |                                                                                                                                                                                                                                                                                                                                                                                                                                                                                                                    |
| Baseline serum creatinine                  | Lowest value (mg/dl) within 365 to 7 days prior to hospital admission. If not available, serum creatinine on hospital admission                                                                                                                                                                                                                                                                                                                                                                                    |
| Home medications                           | Medications that the patient was taking at home within 1 week prior to admission. Does not include those started at an outside hospital if the patient was transferred.                                                                                                                                                                                                                                                                                                                                            |
| Anticoagulation                            | Therapeutic anticoagulants, not including anti-platelet agents such as aspirin or clopidogrel                                                                                                                                                                                                                                                                                                                                                                                                                      |
| Immunosuppressive medication               | Chemotherapy (in the 30 days prior to admission), corticosteroids >10 mg prednisone/day (or equivalent), calcineurin inhibitors (systemic, not topical), mycophenolate mofetil, azathioprine, rituximab, other                                                                                                                                                                                                                                                                                                     |
| <b>Coexisting Conditions</b>               |                                                                                                                                                                                                                                                                                                                                                                                                                                                                                                                    |
| Asthma                                     | Per chart review                                                                                                                                                                                                                                                                                                                                                                                                                                                                                                   |
| Chronic kidney disease                     | Classified into stages using baseline serum creatinine and the CKD-EPI equation (eGFR ≥90, 60-89, 45-59, 30-44, 15-29, <15 ml/min)                                                                                                                                                                                                                                                                                                                                                                                 |
| Chronic liver disease                      | Cirrhosis, alcohol-related liver disease, nonalcoholic fatty liver disease, autoimmune hepatitis, hepatitis B or hepatitis C, primary biliary cirrhosis, or other                                                                                                                                                                                                                                                                                                                                                  |
| Chronic obstructive pulmonary disease      | Per chart review                                                                                                                                                                                                                                                                                                                                                                                                                                                                                                   |
| Congestive heart failure                   | Per chart review; heart failure with preserved versus reduced ejection fraction                                                                                                                                                                                                                                                                                                                                                                                                                                    |
| Coronary artery disease                    | Per chart review; any history of angina, myocardial infarction, or coronary artery bypass graft surgery                                                                                                                                                                                                                                                                                                                                                                                                            |
| Diabetes mellitus                          | Per chart review; insulin versus non-insulin dependent                                                                                                                                                                                                                                                                                                                                                                                                                                                             |
| End stage kidney disease                   | Per chart review; on hemodialysis or peritoneal dialysis                                                                                                                                                                                                                                                                                                                                                                                                                                                           |
| History of alcohol abuse                   | Per chart review                                                                                                                                                                                                                                                                                                                                                                                                                                                                                                   |
| HIV/AIDS                                   | Per chart review                                                                                                                                                                                                                                                                                                                                                                                                                                                                                                   |
| Homelessness                               | Per chart review                                                                                                                                                                                                                                                                                                                                                                                                                                                                                                   |
| Hypertension                               | Per chart review                                                                                                                                                                                                                                                                                                                                                                                                                                                                                                   |
| Malignancy                                 | Per chart review; active malignancy (other than non-melanoma skin cancer) treated in the past year. Defined as cancer of the lung, breast, colorectal, prostate, gastric, pancreatic, melanoma, ovarian, brain, or other                                                                                                                                                                                                                                                                                           |
| Renal transplant                           | Per chart review                                                                                                                                                                                                                                                                                                                                                                                                                                                                                                   |
| Smoking                                    | Per chart review; does not include vaping or smoking of non-tobacco products. Non-smoker, former smoker, current smoker                                                                                                                                                                                                                                                                                                                                                                                            |
| <b>Longitudinal Treatments<sup>a</sup></b> |                                                                                                                                                                                                                                                                                                                                                                                                                                                                                                                    |
| Mechanical ventilation                     | Invasive mechanical ventilation                                                                                                                                                                                                                                                                                                                                                                                                                                                                                    |
| Renal replacement therapy                  | CRRT, intermittent hemodialysis, peritoneal dialysis, other                                                                                                                                                                                                                                                                                                                                                                                                                                                        |
| PaO <sub>2</sub> <sup>b</sup>              | Lowest PaO <sub>2</sub> available during each 24 hour day (midnight to midnight)                                                                                                                                                                                                                                                                                                                                                                                                                                   |
| FiO <sub>2</sub> <sup>b</sup>              | FiO <sub>2</sub> corresponding to the lowest PaO <sub>2</sub>                                                                                                                                                                                                                                                                                                                                                                                                                                                      |
| PEEP <sup>b</sup>                          | Highest PEEP available during each 24 hour day (midnight to midnight)                                                                                                                                                                                                                                                                                                                                                                                                                                              |
| Vasopressors                               | Maximum number of vasopressors required each day                                                                                                                                                                                                                                                                                                                                                                                                                                                                   |
| <b>Outcomes<sup>a</sup></b>                |                                                                                                                                                                                                                                                                                                                                                                                                                                                                                                                    |
| AKI                                        | Determined by comparing the maximum baseline serum creatinine over the first 14 days following ICU admission to baseline serum creatinine. Baseline serum creatinine was defined as the lowest value from within 365 to 7 days prior to hospital admission. If unavailable, the hospital admission value was used as the baseline.                                                                                                                                                                                 |
| Stage 1 AKI                                | A 1.5-1.9 fold increase in serum creatinine from baseline, corresponding with stage 1 of the Kidney Disease: Improving Global Outcomes criteria <sup>1</sup>                                                                                                                                                                                                                                                                                                                                                       |
| Stage 2 AKI                                | A 2-2.9-fold increase in serum creatinine from baseline, corresponding with stage 2 of the Kidney Disease: Improving Global Outcomes criteria <sup>1</sup>                                                                                                                                                                                                                                                                                                                                                         |
| Stage 3 AKI                                | A three-fold or greater increase in serum creatinine from baseline, corresponding with stage 3 of the Kidney Disease: Improving Global Outcomes criteria. <sup>1</sup> Patients with AKI treated with RRT were not included, as AKI-RRT was analyzed as a separate category.                                                                                                                                                                                                                                       |
| AKI-RRT                                    | AKI treated with RRT at any time in the first 14 days following ICU admission                                                                                                                                                                                                                                                                                                                                                                                                                                      |
| RRT/death                                  | AKI-RRT or death at any time in the first 14 days following ICU admission                                                                                                                                                                                                                                                                                                                                                                                                                                          |
| 28-Day mortality                           | Death at any time in the 28 days following ICU admission                                                                                                                                                                                                                                                                                                                                                                                                                                                           |
| Secondary Infection on ICU Day 1           | A confirmed or suspected infection(s) on ICU Day 1 other than COVID-19, including bacterial pneumonia (must have a positive blood or sputum culture, or a positive urine antigen for pneumococcus or legionella, or a new infiltrate on chest imaging suspected to be separate from COVID-related pneumonia), viral respiratory infection (e.g., influenza, parainfluenza, and RSV), biliary sepsis, cellulitis, bacteremia or endocarditis (only if confirmed by blood cultures and/or cardiac imaging), or other |
| Shock                                      | Requirement for 2 or more vasopressors                                                                                                                                                                                                                                                                                                                                                                                                                                                                             |

Abbreviations: AKI, acute kidney injury; CKD-EPI, Chronic Kidney Disease-Epidemiology Collaboration equation; CRRT, continuous renal replacement therapy, eGFR, estimated glomerular filtration rate; FiO<sub>2</sub>, fraction of inspired oxygen; PaO<sub>2</sub>, partial pressure of oxygen; PEEP, positive end-expiratory pressure; RSV, respiratory syncytial virus.

<sup>a</sup>Longitudinal treatments and outcomes were recorded daily for the first 14 days following admission to the ICU.

<sup>b</sup>If multiple values were present, the lowest PaO<sub>2</sub> available, along with the corresponding FiO<sub>2</sub>, was recorded, while the highest PEEP on each day was recorded.

References:

<sup>1</sup>Kidney Disease; Improving Global Outcomes (KDIGO) Acute Kidney Injury Work Group. KDIGO clinical practice guideline for acute kidney injury. *Kidney Int Suppl* 2, 2012: 1-138.

**Supplemental Table 3. Complete List of Patient Characteristics According to AKI Stage.** AKI and its stages in this table refer to AKI occurring in the first 14 days following ICU admission.

| Characteristic                                                | All Patients<br>(N=3099) | No AKI<br>(N=1414) | Stage 1 AKI<br>(N=355) | Stage 2 AKI<br>(N=338) | Stage 3 AKI*<br>(N=355) | AKI-RRT<br>(N=637) |
|---------------------------------------------------------------|--------------------------|--------------------|------------------------|------------------------|-------------------------|--------------------|
| <b>Demographics</b>                                           |                          |                    |                        |                        |                         |                    |
| Age (yr)                                                      |                          |                    |                        |                        |                         |                    |
| Median (IQR)                                                  | 62 (51-71)               | 60 (49-70)         | 64 (52-74)             | 66 (57-75)             | 65 (55-73)              | 62 (52-69)         |
| Distribution – no. (%)                                        |                          |                    |                        |                        |                         |                    |
| 18–39                                                         | 271 (8.7)                | 159 (11.2)         | 31 (8.7)               | 18 (5.3)               | 22 (6.2)                | 41 (6.4)           |
| 40–49                                                         | 394 (12.7)               | 211 (14.9)         | 39 (11.0)              | 31 (9.2)               | 36 (10.1)               | 77 (12.1)          |
| 50–59                                                         | 661 (21.3)               | 315 (22.3)         | 71 (20.0)              | 58 (17.2)              | 61 (17.2)               | 156 (24.5)         |
| 60–69                                                         | 869 (28.0)               | 353 (25.0)         | 88 (24.8)              | 95 (28.1)              | 119 (33.5)              | 214 (33.6)         |
| 70–79                                                         | 618 (19.9)               | 252 (17.8)         | 83 (23.4)              | 86 (25.4)              | 73 (20.6)               | 124 (19.5)         |
| ≥80                                                           | 286 (9.2)                | 124 (8.8)          | 43 (12.1)              | 50 (14.8)              | 44 (12.4)               | 25 (3.9)           |
| Male sex – no. (%)                                            | 2003 (64.6)              | 864 (61.1)         | 235 (66.2)             | 212 (62.7)             | 235 (66.2)              | 457 (71.7)         |
| Race – no. (%)                                                |                          |                    |                        |                        |                         |                    |
| White                                                         | 1154 (37.2)              | 581 (41.1)         | 155 (43.7)             | 135 (39.9)             | 110 (31.0)              | 173 (27.2)         |
| Black                                                         | 952 (30.7)               | 364 (25.7)         | 99 (27.9)              | 108 (32.0)             | 101 (28.5)              | 280 (44.0)         |
| Asian                                                         | 190 (6.1)                | 106 (7.5)          | 17 (4.8)               | 18 (5.3)               | 22 (6.2)                | 27 (4.2)           |
| Other                                                         | 803 (25.9)               | 363 (25.7)         | 84 (23.7)              | 77 (22.8)              | 122 (34.4)              | 157 (24.7)         |
| Hispanic – no. (%)                                            | 1045 (33.7)              | 485 (34.3)         | 113 (31.8)             | 111 (32.8)             | 144 (40.6)              | 192 (30.1)         |
| BMI – median (IQR)                                            | 30.4 (26.6-36.1)         | 29.4 (25.9-34.6)   | 31.5 (26.8-36.2)       | 30.5 (26.6-34.7)       | 29.8 (26.1-35.7)        | 32.6 (28.1-39.3)   |
| Pregnant – no. (%)                                            | 20 (0.6)                 | 14 (1.0)           | 3 (0.8)                | 1 (0.3)                | 2 (0.6)                 | 0 (0)              |
| Homeless – no. (%)                                            | 21 (0.7)                 | 12 (0.9)           | 3 (0.8)                | 1 (0.3)                | 3 (0.9)                 | 2 (0.3)            |
| Source of admission to ICU – no. (%)                          |                          |                    |                        |                        |                         |                    |
| Emergency department                                          | 1727 (55.7)              | 757 (53.5)         | 226 (63.7)             | 191 (56.5)             | 225 (63.4)              | 328 (51.5)         |
| Hospital ward                                                 | 966 (31.2)               | 458 (32.4)         | 91 (25.6)              | 114 (33.7)             | 106 (30.0)              | 197 (30.9)         |
| Transfer from another hospital                                | 391 (12.6)               | 193 (13.7)         | 35 (9.9)               | 30 (8.9)               | 23 (6.5)                | 110 (17.3)         |
| Other                                                         | 15 (0.5)                 | 6 (0.4)            | 3 (0.9)                | 3 (0.9)                | 1 (0.3)                 | 2 (0.3)            |
| Days from symptom onset to ICU admission – median (IQR)       | 7 (4-10)                 | 7 (4-11)           | 7 (4-9)                | 7 (4-10)               | 7 (4-10)                | 7 (5-10)           |
| <b>Coexisting conditions – no. (%)<sup>a</sup></b>            |                          |                    |                        |                        |                         |                    |
| IDDM                                                          | 419 (13.5)               | 129 (9.1)          | 56 (15.8)              | 65 (19.2)              | 54 (15.2)               | 115 (18.1)         |
| NIIDDM                                                        | 811 (26.2)               | 318 (22.5)         | 84 (23.7)              | 88 (26.0)              | 98 (27.6)               | 223 (35.0)         |
| Hypertension                                                  | 1869 (60.3)              | 718 (50.8)         | 232 (65.4)             | 240 (71.0)             | 222 (62.5)              | 457 (71.7)         |
| COPD                                                          | 258 (8.3)                | 91 (6.4)           | 41 (11.6)              | 37 (11.0)              | 34 (9.6)                | 55 (8.6)           |
| Asthma                                                        | 337 (10.9)               | 161 (11.4)         | 49 (13.8)              | 30 (8.9)               | 44 (12.4)               | 53 (8.3)           |
| Other pulmonary disease                                       | 224 (7.2)                | 78 (5.5)           | 41 (11.6)              | 31 (9.2)               | 31 (8.7)                | 43 (6.8)           |
| Current or former smoker                                      | 917 (29.6)               | 385 (27.2)         | 117 (33.0)             | 114 (33.7)             | 120 (33.8)              | 181 (28.4)         |
| Alcohol abuse disorder                                        | 169 (5.5)                | 76 (5.4)           | 21 (5.9)               | 26 (7.7)               | 24 (6.8)                | 22 (3.5)           |
| Coronary artery disease                                       | 390 (12.6)               | 127 (9.0)          | 57 (16.1)              | 60 (17.8)              | 61 (17.2)               | 85 (13.3)          |
| Congestive heart failure                                      | 270 (8.7)                | 77 (5.5)           | 45 (12.7)              | 44 (13.0)              | 34 (9.6)                | 70 (11.0)          |
| Chronic liver disease                                         | 104 (3.4)                | 26 (1.8)           | 16 (4.5)               | 17 (5.0)               | 18 (5.1)                | 27 (4.2)           |
| Chronic kidney disease <sup>b</sup>                           |                          |                    |                        |                        |                         |                    |
| eGFR ≥90 ml/min/1.73m <sup>2</sup>                            | 1033 (33.3)              | 523 (37.0)         | 130 (36.6)             | 99 (29.3)              | 135 (38.0)              | 146 (22.9)         |
| eGFR 60-89 ml/min/1.73m <sup>2</sup>                          | 1164 (37.6)              | 542 (38.3)         | 127 (35.8)             | 134 (39.6)             | 145 (40.9)              | 219 (34.4)         |
| eGFR 45-59 ml/min/1.73m <sup>2</sup>                          | 419 (13.5)               | 170 (12.0)         | 53 (14.9)              | 59 (17.5)              | 41 (11.6)               | 96 (15.1)          |
| eGFR 30-44 ml/min/1.73m <sup>2</sup>                          | 255 (8.2)                | 102 (7.2)          | 30 (8.5)               | 30 (8.9)               | 27 (7.6)                | 66 (10.4)          |
| eGFR 15-29 ml/min/1.73m <sup>2</sup>                          | 159 (5.2)                | 60 (4.2)           | 13 (3.7)               | 16 (4.7)               | 7 (2.0)                 | 64 (10.1)          |
| eGFR <15 ml/min/1.73m <sup>2</sup>                            | 64 (2.1)                 | 17 (1.2)           | 2 (0.6)                | 0 (0)                  | 0 (0)                   | 46 (7.2)           |
| Active malignancy                                             | 58 (1.9)                 | 19 (1.3)           | 7 (2.0)                | 9 (2.7)                | 2 (0.6)                 | 21 (3.3)           |
| Immunodeficiency                                              | 158 (5.1)                | 55 (3.9)           | 23 (6.5)               | 25 (7.4)               | 23 (6.5)                | 32 (5.0)           |
| HIV/AIDS                                                      | 40 (1.3)                 | 16 (1.3)           | 40 (2.0)               | 2 (0.6)                | 3 (0.9)                 | 12 (1.9)           |
| <b>Home medications – no. (%)</b>                             |                          |                    |                        |                        |                         |                    |
| Immunosuppressants                                            | 312 (10.7)               | 120 (8.5)          | 40 (11.3)              | 54 (16.0)              | 32 (9.0)                | 66 (10.4)          |
| ACE-I                                                         | 566 (18.3)               | 220 (15.6)         | 68 (19.2)              | 67 (19.8)              | 76 (21.4)               | 135 (21.2)         |
| ARB                                                           | 513 (16.6)               | 178 (12.6)         | 56 (15.8)              | 70 (20.7)              | 55 (15.5)               | 154 (24.2)         |
| Mineralocorticoid antagonist                                  | 81 (2.6)                 | 19 (1.3)           | 14 (3.9)               | 14 (4.1)               | 15 (4.2)                | 19 (3.0)           |
| Beta-blocker                                                  | 788 (25.4)               | 281 (19.9)         | 108 (30.4)             | 101 (29.9)             | 100 (28.2)              | 198 (31.1)         |
| Other antihypertensive                                        | 892 (28.8)               | 312 (22.1)         | 106 (30.0)             | 126 (37.3)             | 113 (31.8)              | 235 (36.9)         |
| Statin                                                        | 1156 (37.3)              | 453 (32.0)         | 142 (40.0)             | 146 (43.2)             | 144 (40.6)              | 271 (42.5)         |
| NSAID                                                         | 260 (8.4)                | 120 (8.5)          | 25 (7.0)               | 37 (11.0)              | 17 (4.8)                | 61 (9.6)           |
| Aspirin                                                       | 664 (21.4)               | 236 (16.7)         | 90 (25.4)              | 87 (25.7)              | 97 (27.3)               | 154 (24.2)         |
| Anticoagulant                                                 | 272 (8.8)                | 99 (7.0)           | 48 (13.5)              | 45 (13.3)              | 38 (10.7)               | 42 (6.6)           |
| Vitamin C                                                     | 77 (2.5)                 | 34 (2.4)           | 13 (3.7)               | 8 (2.4)                | 9 (2.5)                 | 13 (2.0)           |
| Vitamin D                                                     | 317 (10.2)               | 123 (8.7)          | 47 (13.2)              | 41 (12.1)              | 38 (10.7)               | 68 (10.7)          |
| <b>Vital signs on the day of ICU admission – median (IQR)</b> |                          |                    |                        |                        |                         |                    |
| Temperature – °C                                              | 38.1 (37.3-38.9)         | 38.0 (37.3-38.8)   | 38.1 (37.2-38.9)       | 38.1 (37.3-38.9)       | 37.9 (37.2-38.9)        | 38.2 (37.4-39.0)   |
| SBP – mm Hg                                                   | 97 (86-111)              | 98 (88-112)        | 98 (85-114)            | 95 (84-107)            | 94 (82-108)             | 95 (84-111)        |
| Heart rate – beats per min                                    | 104 (90-120)             | 102 (88-115)       | 108 (93-122)           | 104 (92-120)           | 109 (93-127)            | 108 (93-122)       |
| Respiratory rate – per min                                    | 31 (26-38)               | 32 (26-39)         | 32 (25-36)             | 30 (26-38)             | 30 (26-39)              | 32 (27-38)         |
| Urine output – ml/day                                         | 725 (350-1250)           | 855 (500-1375)     | 760 (350-1268)         | 749 (442-1128)         | 675 (300-1250)          | 500 (200-930)      |

| Characteristic                                                         | All Patients (N=3099) | No AKI (N=1414)  | Stage 1 AKI (N=355) | Stage 2 AKI (N=338) | Stage 3 AKI* (N=355) | AKI-RRT (N=637)  |
|------------------------------------------------------------------------|-----------------------|------------------|---------------------|---------------------|----------------------|------------------|
| <b>Laboratory findings on the day of ICU admission – median (IQR)</b>  |                       |                  |                     |                     |                      |                  |
| White-cell count – per mm <sup>3</sup>                                 | 8.2 (5.9-11.5)        | 7.6 (5.7-10.6)   | 8.0 (5.7-11.5)      | 8.5 (4.7-11.7)      | 9.3 (6.3-13.1)       | 8.9 (6.5-12.2)   |
| Lymphocyte count – per mm <sup>3</sup>                                 | 824 (561-1152)        | 854 (603-1158)   | 765 (504-1100)      | 787 (508-1121)      | 815 (528-1201)       | 796 (541-1148)   |
| Hemoglobin – g/dl                                                      | 12.7 (11.2-14.1)      | 12.8 (11.5-14.2) | 12.6 (11.2-14.0)    | 12.6 (11.1-14.1)    | 12.8 (10.9-14.2)     | 12.6 (10.9-14.0) |
| Platelet count – K/mm <sup>3</sup>                                     | 214 (164-272)         | 217 (166-276)    | 208 (155-268)       | 215 (166-277)       | 213 (168-277)        | 207 (164-260)    |
| Creatinine – mg/dl                                                     | 1.04 (0.80-1.55)      | 0.91 (0.72-1.18) | 1.07 (0.81-1.48)    | 1.16 (0.90-1.91)    | 1.20 (0.82-1.81)     | 1.47 (1.0-2.85)  |
| Albumin – g/dl                                                         | 3.2 (2.8-3.6)         | 3.3 (2.9-3.6)    | 3.3 (2.8-3.6)       | 3.2 (2.8-3.6)       | 3.1 (2.7-3.4)        | 3.1 (2.7-3.5)    |
| AST – U/L                                                              | 55 (36-85)            | 52 (35-80)       | 47 (33-72)          | 53 (36-83)          | 65 (42-112)          | 63 (41-96)       |
| ALT – U/L                                                              | 37 (23-60)            | 36 (23-59)       | 32 (21-51)          | 34 (21-56)          | 43 (26-71)           | 39 (24-62)       |
| Total bilirubin – mg/dl                                                | 0.6 (0.4-0.8)         | 0.6 (0.4-0.8)    | 0.6 (0.4-0.8)       | 0.6 (0.4-0.9)       | 0.6 (0.4-0.9)        | 0.6 (0.4-0.8)    |
| Lactate – mmol/L                                                       | 1.5 (1.1-2.3)         | 1.4 (1.1-2.1)    | 1.5 (1.1-2.2)       | 1.6 (1.2-2.5)       | 1.9 (1.2-2.5)        | 1.5 (1.1-2.3)    |
| Arterial pH                                                            | 7.37 (7.30-7.43)      | 7.40 (7.34-7.45) | 7.37 (7.31-7.42)    | 7.37 (7.31-7.42)    | 7.34 (7.26-7.40)     | 7.33 (7.26-7.40) |
| D-dimer – ng/mL                                                        | 1310 (700-3263)       | 1040 (610-2119)  | 1320 (680-2630)     | 1509 (785-3565)     | 1980 (820-6110)      | 2000 (869-6998)  |
| C-reactive protein – mg/L                                              | 157 (90-237)          | 145 (80-221)     | 157 (82-235)        | 167 (105-249)       | 158 (100-252)        | 175 (104-269)    |
| Interleukin-6 – pg/mL                                                  | 56 (19-154)           | 46 (17-115)      | 54 (10-180)         | 55 (28-119)         | 50 (18-160)          | 100 (29-251)     |
| Procalcitonin – ng/ml                                                  | 0.4 (0.2-1.3)         | 0.3 (0.1-0.7)    | 0.4 (0.1-1.0)       | 0.5 (0.2-1.4)       | 0.6 (0.2-2.0)        | 0.8 (0.3-3.4)    |
| Ferritin – ng/ml                                                       | 1005 (499-1977)       | 978 (467-1655)   | 827 (414-1737)      | 919 (511-1996)      | 1275 (477-2729)      | 1206 (643-2262)  |
| CPK – U/L                                                              | 212 (98-565)          | 178 (92-459)     | 166 (75-377)        | 183 (78-431)        | 233 (110-689)        | 361 (159-1074)   |
| Sodium – mEq/l                                                         | 137 (134-40)          | 137 (134-140)    | 137 (134-140)       | 137 (134-140)       | 137 (134-141)        | 136 (133-139)    |
| <b>Severity-of-illness on the day of ICU admission</b>                 |                       |                  |                     |                     |                      |                  |
| Invasive MV – no. (%)                                                  | 2044 (66.0)           | 785 (55.5)       | 241 (67.9)          | 237 (70.1)          | 277 (78.0)           | 504 (79.1)       |
| FiO <sub>2</sub> – median (IQR)                                        | 0.8 (0.6-1.0)         | 0.7 (0.5-1.0)    | 0.8 (0.5-1.0)       | 0.9 (0.6-1.0)       | 1.0 (0.6-1.0)        | 0.9 (0.6-1.0)    |
| PEEP, cm H <sub>2</sub> O – median (IQR)                               | 12 (10-15)            | 12 (10-15)       | 12 (10-15)          | 12 (10-15)          | 14 (10-15)           | 14 (10-16)       |
| PaO <sub>2</sub> :FiO <sub>2</sub> , mm Hg – median (IQR) <sup>c</sup> | 126 (85-194)          | 146 (103-217)    | 134 (88-216)        | 114 (79-181)        | 117 (84-183)         | 104 (74-104)     |
| Non-invasive MV – no. (%)                                              | 54 (1.7)              | 20 (1.4)         | 7 (2.0)             | 12 (3.6)            | 7 (2.0)              | 8 (1.3)          |
| HFNC or NRB – no. (%)                                                  | 619 (20.0)            | 381 (26.9)       | 58 (16.3)           | 57 (16.9)           | 44 (12.4)            | 79 (12.4)        |
| Vasopressors – no. (%)                                                 | 1305 (42.1)           | 388 (27.4)       | 156 (43.9)          | 162 (47.9)          | 175 (49.3)           | 324 (50.9)       |
| Altered mental status – no. (%)                                        | 681 (22.0)            | 255 (18.0)       | 90 (25.4)           | 94 (27.8)           | 113 (31.8)           | 129 (20.3)       |

The stages of AKI are defined according to modified serum creatinine (SCr)-based definitions established by the Kidney Disease: Improving Global Outcomes Criteria. \*AKI stage 3 is exclusive of AKI treated with RRT (AKI-RRT), as AKI-RRT is presented separately. Thus, each of the categories above are mutually exclusive. The lowest SCr between 365 and 7 days prior to hospital admission was used as the baseline value. If unavailable, the hospital admission SCr was used as the baseline value.

Abbreviations: ACE-I, Angiotensin converting enzyme inhibitor; ALT, alanine aminotransferase; ARB, Angiotensin II receptor blocker; AST, aspartate aminotransferase; BMI, body mass index; COPD, chronic obstructive pulmonary disease; CPK, creatinine phosphokinase; eGFR, estimated glomerular filtration rate, HFNC, high flow nasal cannula; IDDM, insulin dependent diabetes mellitus; MV, mechanical ventilation; NIDDM, non-insulin dependent diabetes mellitus; NRB, nonrebreather; NSAID, non-steroidal anti-inflammatory drug; PaO<sub>2</sub>:FiO<sub>2</sub>, the ratio of the partial pressure of arterial oxygen (PaO<sub>2</sub>) over the fraction of inspired oxygen (FiO<sub>2</sub>); PEEP, positive end-expiratory pressure; SBP, systolic blood pressure.

<sup>a</sup>The definitions of the coexisting disorders are provided in the supplemental material.

<sup>b</sup>Baseline eGFR was calculated using the CKD-EPI equation, using the lowest SCr between 365 and 7 days prior to hospital admission as the baseline value. If unavailable, the hospital admission SCr was used as the baseline value.

<sup>c</sup>PaO<sub>2</sub>:FiO<sub>2</sub> refers to the ratio of the partial pressure of arterial oxygen (PaO<sub>2</sub>) over the fraction of inspired oxygen (FiO<sub>2</sub>), and was only assessed in patients receiving invasive mechanical ventilation.

Data regarding BMI were missing for 215 patients (6.9%)  
 Data regarding homelessness were missing in 3 patients (0.1%)  
 Data regarding alcohol abuse were missing in 1 patient (0.03%)  
 Data regarding systolic blood pressure were missing in 2 patients (0.1%)  
 Data regarding heart rate were missing in 1 patient (0.03%)  
 Data regarding respiratory rate were missing in 1 patient (0.03%)  
 Data regarding white blood cell count were missing in 142 patients (4.5%)  
 Data regarding lymphocyte count were missing in 537 patients (17.3%)  
 Data regarding hemoglobin were missing in 149 patients (4.8%)  
 Data regarding platelets were missing in 159 patients (5.1%)  
 Data regarding creatinine were missing in 108 patients (3.4%)  
 Data regarding albumin were missing in 566 patients (18.3%)  
 Data regarding AST were missing in 557 patients (18%)  
 Data regarding ALT were missing in 536 patients (17.3%)  
 Data regarding bilirubin were missing in 543 patients (17.5%)  
 Data regarding lactate were missing in 1147 patients (37%)  
 Data regarding pH were missing in 934 patients (30.1%)  
 Data regarding D-dimer were missing in 1520 patients (49%)  
 Data regarding C-reactive protein were missing in 1204 patients (38.9%)  
 Data regarding interleukin-6 were missing in 2472 patients (79.8%)  
 Data regarding pro-calcitonin were missing in 1145 patients (37%)  
 Data regarding ferritin were missing in 1337 patients (43%)  
 Data regarding creatine phosphokinase were missing in 1612 patients (52%)  
 Data regarding sodium were missing in 12 patients (0.4%)  
 Data regarding FiO<sub>2</sub> were missing in 225 out of 2044 patients who received invasive mechanical ventilation (11.0%)  
 Data regarding PEEP were missing in 255 out of 2044 patients who received invasive mechanical ventilation (11.0%)  
 Data regarding PaO<sub>2</sub>:FiO<sub>2</sub> were missing in 357 out of 2044 patients who received invasive mechanical ventilation (17.5%)

**Supplemental Table 4. Characteristics of Patients with AKI-RRT on Days 1 and 2 Versus Days 3 Through 14.**

| Characteristic                                            | RRT Initiation on Days 1-2 (n=166) | RRT Initiation on Days 3-14 (n=471) |
|-----------------------------------------------------------|------------------------------------|-------------------------------------|
| <b>Demographics</b>                                       |                                    |                                     |
| Age (yrs) – median (IQR)                                  | 57 (49-67)                         | 63 (54-70)                          |
| Male sex – no. (%)                                        | 119 (71.7)                         | 338 (71.8)                          |
| White Race – no. (%)                                      | 38 (22.9)                          | 135 (28.7)                          |
| Hispanic – no. (%)                                        | 46 (27.7)                          | 146 (31.0)                          |
| Body mass index (kg/m <sup>2</sup> ) – median (IQR)       | 33.9 (29.6-42.0)                   | 32.4 (27.5-38.6)                    |
| <b>Comorbidities</b>                                      |                                    |                                     |
| Diabetes mellitus                                         | 89 (53.6)                          | 248 (52.7)                          |
| Hypertension                                              | 122 (73.5)                         | 335 (71.1)                          |
| Coronary artery disease                                   | 15 (9.0)                           | 70 (14.9)                           |
| Congestive heart failure                                  | 18 (10.8)                          | 52 (11.0)                           |
| Active malignancy                                         | 9 (5.4)                            | 23 (4.9)                            |
| Chronic kidney disease                                    |                                    |                                     |
| eGFR ≥90 ml/min/1.73m <sup>2</sup>                        | 35 (21.1)                          | 111 (23.6)                          |
| eGFR 60-89 ml/min/1.73m <sup>2</sup>                      | 36 (21.7)                          | 183 (38.9)                          |
| eGFR 45-59 ml/min/1.73m <sup>2</sup>                      | 21 (12.7)                          | 75 (15.9)                           |
| eGFR 30-44 ml/min/1.73m <sup>2</sup>                      | 14 (8.4)                           | 52 (11.0)                           |
| eGFR 15-29 ml/min/1.73m <sup>2</sup>                      | 28 (16.9)                          | 36 (7.6)                            |
| eGFR <15 ml/min/1.73m <sup>2</sup>                        | 32 (19.3)                          | 14 (3.0)                            |
| <b>Vital Signs on ICU Day 1</b>                           |                                    |                                     |
| Temperature – °C                                          | 38.0 (37.2-38.9)                   | 38.3 (37.4-39.0)                    |
| Systolic blood pressure – mm Hg                           | 95 (85-111)                        | 95 (84-110)                         |
| Heart rate – beats per min                                | 107 (93-121)                       | 108 (94-122)                        |
| Urine output – ml/day                                     | 250 (100-600)                      | 600 (280-1020)                      |
| <b>Labs on ICU Day 1</b>                                  |                                    |                                     |
| White-cell count – per mm <sup>3</sup>                    | 9.8 (7.7-13.1)                     | 8.5 (6.1-11.8)                      |
| Lymphocyte count – per mm <sup>3</sup>                    | 772 (517-1134)                     | 814 (547-1154)                      |
| Platelet count – K/mm <sup>3</sup>                        | 208 (162-254)                      | 207 (165-266)                       |
| Total bilirubin – mg/dl                                   | 0.6 (0.4-0.9)                      | 0.6 (0.4-0.8)                       |
| D-dimer – ng/mL                                           | 3793 (1390-9958)                   | 1608 (822-4971)                     |
| C-reactive protein – mg/L                                 | 192 (119-314)                      | 165 (102-261)                       |
| <b>Severity of Illness on ICU Day 1</b>                   |                                    |                                     |
| Invasive mechanical ventilation – no. (%)                 | 152 (91.6)                         | 352 (74.7)                          |
| FiO <sub>2</sub> - median (IQR)                           | 90 (60-100)                        | 90 (60-100)                         |
| PEEP, cm of water – median (IQR)                          | 15 (12-18)                         | 14 (10-16)                          |
| PaO <sub>2</sub> :FiO <sub>2</sub> , mm Hg – median (IQR) | 101 (74-150)                       | 108 (74-167)                        |
| Non-invasive mechanical ventilation – no. (%)             | 1 (0.6)                            | 7 (1.5)                             |
| High-flow nasal cannula or NRB – no. (%)                  | 8 (4.8)                            | 71 (15.1)                           |
| Altered mental status – no. (%)                           | 106 (63.9)                         | 218 (46.3)                          |
| Vasopressors – no. (%)                                    | 38 (22.9)                          | 91 (19.3)                           |
| <b>Hospital Characteristics</b>                           |                                    |                                     |
| Regional Density of COVID-19 – median (IQR)               | 3 (2-4)                            | 3 (2-4)                             |
| Number of ICU beds – median (IQR)                         | 100 (48-130)                       | 73 (47-111)                         |

Abbreviations: COVID-19, coronavirus disease 2019; eGFR, estimated glomerular filtration rate; ICU, intensive care unit; IQR, interquartile range; PaO<sub>2</sub>:FiO<sub>2</sub>, the ratio of the partial pressure of arterial oxygen over the fraction of inspired oxygen; PEEP, positive end-expiratory pressure

**Supplemental Table 5. Multivariable Model for AKI-RRT, Accounting for Clustering.** Additional details provided in the Methods.

| Variable                                                               | Odds Ratio (95% CI) for AKI-RRT |
|------------------------------------------------------------------------|---------------------------------|
| Age (yrs)                                                              |                                 |
| 18-39 (REF)                                                            | 1.00                            |
| 40-49                                                                  | 1.14 (0.84-1.55)                |
| 50-59                                                                  | 1.53 (1.11-2.10)                |
| 60-69                                                                  | 1.59 (1.16-2.18)                |
| 70-79                                                                  | 1.24 (0.87-1.76)                |
| ≥80                                                                    | 0.48 (0.27-0.88)                |
| Male Sex                                                               | 1.88 (1.58-2.23)                |
| Non-White Race                                                         | 1.75 (1.48-2.06)                |
| Hypertension                                                           | 1.25 (0.99-1.58)                |
| Diabetes Mellitus                                                      | 1.59 (1.33-1.91)                |
| Body Mass Index (kg/m <sup>2</sup> )                                   |                                 |
| <25 (REF)                                                              | 1.00                            |
| 25-29.9                                                                | 1.79 (1.30-2.46)                |
| 30-34.9                                                                | 2.14 (1.56-2.93)                |
| 35-39.9                                                                | 2.38 (1.69-3.37)                |
| ≥40                                                                    | 3.21 (2.31-4.47)                |
| Chronic Kidney Disease                                                 |                                 |
| No CKD (eGFR >60 ml/min/1.73m <sup>2</sup> ) (REF)                     | 1.00                            |
| CKD stage 3 (eGFR 30-60 ml/min/1.73m <sup>2</sup> )                    | 1.62 (1.30-2.01)                |
| CKD stages 4 or 5 (eGFR <30 ml/min/1.73m <sup>2</sup> )                | 5.34 (4.24-6.72)                |
| Coronary Artery Disease                                                | 0.90 (0.71-1.15)                |
| Congestive Heart Failure                                               | 1.29 (1.02-1.64)                |
| Active Malignancy                                                      | 1.17 (0.85-1.61)                |
| ≤3 days from Hospital Admission to ICU Admission                       | 0.79 (0.66-0.93)                |
| Lymphocyte Count <1,000 per mm <sup>3</sup> on ICU Day 1               | 1.11 (0.89-1.38)                |
| Hypoxemia, ICU Day 1                                                   |                                 |
| Not Receiving Mechanical Ventilation (REF)                             | 1.00                            |
| Mechanically ventilated and PaO <sub>2</sub> :FiO <sub>2</sub> ≥200    | 1.22 (0.88-1.70)                |
| Mechanically ventilated and PaO <sub>2</sub> :FiO <sub>2</sub> 100–199 | 1.23 (0.93-1.61)                |
| Mechanically ventilated and PaO <sub>2</sub> :FiO <sub>2</sub> <100    | 3.00 (2.33-3.86)                |
| Shock on ICU Day 1                                                     | 1.01 (0.76-1.33)                |
| Altered Mental Status, ICU Day 1                                       | 0.72 (0.59-0.86)                |
| Secondary Infection, ICU Day 1                                         | 1.11 (0.92-1.35)                |
| Coagulation Component of SOFA Score                                    |                                 |
| 0 (REF)                                                                | 1.00                            |
| 1                                                                      | 1.17 (0.92-1.48)                |
| 2-4                                                                    | 1.23 (0.85-1.78)                |
| Liver Component of SOFA Score                                          |                                 |
| 0 (REF)                                                                | 1.00                            |
| 1                                                                      | 1.08 (0.75-1.55)                |
| 2-4                                                                    | 1.24 (0.85-1.78)                |
| D-dimer (ng/ml) on ICU Day 1                                           |                                 |
| <1000 (REF)                                                            | 1.00                            |
| 1000-2500                                                              | 1.14 (0.90-1.45)                |
| >2500                                                                  | 1.85 (1.47-2.34)                |
| Hospital Size (no. of ICU beds)                                        |                                 |
| Large (≥100 ICU beds) (REF)                                            | 1.00                            |
| Medium (50–99 ICU beds)                                                | 0.90 (0.64-1.27)                |
| Small (<50 ICU beds)                                                   | 1.03 (0.76-1.38)                |
| Regional Density of COVID-19                                           |                                 |
| 1 (REF)                                                                | 1.00                            |
| 2                                                                      | 0.93 (0.52-1.66)                |
| 3                                                                      | 0.72 (0.44-1.17)                |
| 4                                                                      | 0.77 (0.48-1.24)                |

Abbreviations: CKD, chronic kidney disease; COVID-19, coronavirus disease 2019; eGFR, estimated glomerular filtration rate; ICU, intensive care unit; PaO<sub>2</sub>:FiO<sub>2</sub>, the ratio of the partial pressure of arterial oxygen over the fraction of inspired oxygen; SOFA, Sequential Organ Failure Assessment.

**Supplemental Table 6. Multivariable Model for AKI-RRT among Patients with a Pre-Hospital Baseline Serum Creatinine Available.**

| Variable                                                               | Odds Ratio (95% CI) for AKI-RRT |
|------------------------------------------------------------------------|---------------------------------|
| Age (yrs)                                                              |                                 |
| 18-39 (REF)                                                            | 1.00                            |
| 40-49                                                                  | 1.09 (0.49-2.41)                |
| 50-59                                                                  | 1.24 (0.60-2.57)                |
| 60-69                                                                  | 1.36 (0.67-2.74)                |
| 70-79                                                                  | 0.98 (0.47-2.05)                |
| ≥80                                                                    | 0.42 (0.16-1.08)                |
| Male Sex                                                               | 1.78 (1.28-2.47)                |
| Non-White Race                                                         | 2.34 (1.67-3.28)                |
| Hypertension                                                           | 1.43 (0.96-2.13)                |
| Diabetes Mellitus                                                      | 1.45 (1.06-1.90)                |
| Body Mass Index (kg/m <sup>2</sup> )                                   |                                 |
| <25 (REF)                                                              | 1.00                            |
| 25-29.9                                                                | 1.50 (0.87-2.59)                |
| 30-34.9                                                                | 1.70 (0.98-2.95)                |
| 35-39.9                                                                | 2.63 (1.42-4.87)                |
| ≥40                                                                    | 2.22 (1.22-4.07)                |
| Chronic Kidney Disease                                                 |                                 |
| No CKD (eGFR >60 ml/min/1.73m <sup>2</sup> ) (REF)                     | 1.00                            |
| CKD stage 3 (eGFR 30-60 ml/min/1.73m <sup>2</sup> )                    | 1.61 (1.11-2.35)                |
| CKD stages 4 or 5 (eGFR <30 ml/min/1.73m <sup>2</sup> )                | 8.92 (4.86-16.36)               |
| Coronary Artery Disease                                                | 1.10 (0.68-1.50)                |
| Congestive Heart Failure                                               | 1.18 (0.77-1.83)                |
| Active Malignancy                                                      | 1.42 (0.82-2.44)                |
| ≤3 days from Hospital Admission to ICU Admission                       | 0.73 (0.52-1.03)                |
| Lymphocyte Count <1,000 per mm <sup>3</sup> on ICU Day 1               | 1.17 (0.82-1.68)                |
| Hypoxemia, ICU Day 1                                                   |                                 |
| Not Receiving Mechanical Ventilation (REF)                             | 1.00                            |
| Mechanically ventilated and PaO <sub>2</sub> :FiO <sub>2</sub> ≥200    | 1.45 (0.80-2.65)                |
| Mechanically ventilated and PaO <sub>2</sub> :FiO <sub>2</sub> 100–199 | 3.22 (2.13-4.88)                |
| Mechanically ventilated and PaO <sub>2</sub> :FiO <sub>2</sub> <100    | 3.90 (2.57-5.92)                |
| Shock on ICU Day 1                                                     | 0.93 (0.58-1.51)                |
| Altered Mental Status, ICU Day 1                                       | 0.71 (0.49-1.04)                |
| Secondary Infection, ICU Day 1                                         | 1.06 (0.75-1.51)                |
| Coagulation Component of SOFA Score                                    |                                 |
| 0 (REF)                                                                | 1.00                            |
| 1                                                                      | 1.16 (0.77-1.73)                |
| 2-4                                                                    | 1.34 (0.73-2.43)                |
| Liver Component of SOFA Score                                          |                                 |
| 0 (REF)                                                                | 1.00                            |
| 1                                                                      | 1.15 (0.52-2.51)                |
| 2-4                                                                    | 1.20 (0.72-2.01)                |
| D-dimer (ng/ml) on ICU Day 1                                           |                                 |
| <1000 (REF)                                                            | 1.00                            |
| 1000-2500                                                              | 1.42 (0.86-2.35)                |
| >2500                                                                  | 1.60 (0.99-2.60)                |
| Hospital Size (no. of ICU beds)                                        |                                 |
| Large (≥100 ICU beds) (REF)                                            | 1.00                            |
| Medium (50–99 ICU beds)                                                | 0.88 (0.59-1.33)                |
| Small (<50 ICU beds)                                                   | 1.25 (0.85-1.84)                |
| Regional Density of COVID-19                                           |                                 |
| 1 (REF)                                                                | 1.00                            |
| 2                                                                      | 1.24 (0.72-2.11)                |
| 3                                                                      | 0.73 (0.45-1.19)                |
| 4                                                                      | 0.52 (0.32-0.88)                |

Abbreviations: CKD, chronic kidney disease; COVID-19, coronavirus disease 2019; eGFR, estimated glomerular filtration rate; ICU, intensive care unit; PaO<sub>2</sub>:FiO<sub>2</sub>, the ratio of the partial pressure of arterial oxygen over the fraction of inspired oxygen; SOFA, Sequential Organ Failure Assessment.



**Supplemental Table 7. Multivariable Model for AKI-RRT Excluding Patients Transferred from an Outside Hospital.** N=391 excluded; n=2708 included in the analysis.

| Variable                                                               | Odds Ratio (95% CI) for AKI-RRT |
|------------------------------------------------------------------------|---------------------------------|
| Age (yrs)                                                              |                                 |
| 18-39 (REF)                                                            | 1.00                            |
| 40-49                                                                  | 0.98 (0.59-1.64)                |
| 50-59                                                                  | 1.45 (0.91-2.31)                |
| 60-69                                                                  | 1.39 (0.87-1.20)                |
| 70-79                                                                  | 1.12 (0.68-1.85)                |
| ≥80                                                                    | 0.36 (0.18-0.71)                |
| Male Sex                                                               | 1.87 (1.47-2.37)                |
| Non-White Race                                                         | 1.70 (1.35-2.15)                |
| Hypertension                                                           | 1.33 (1.04-1.71)                |
| Diabetes Mellitus                                                      | 1.61 (1.29-2.01)                |
| Body Mass Index (kg/m <sup>2</sup> )                                   |                                 |
| <25 (REF)                                                              | 1.00                            |
| 25-29.9                                                                | 1.64 (1.12-2.42)                |
| 30-34.9                                                                | 1.85 (1.24-2.76)                |
| 35-39.9                                                                | 2.23 (1.43-3.48)                |
| ≥40                                                                    | 2.83 (1.84-4.36)                |
| Chronic Kidney Disease                                                 |                                 |
| No CKD (eGFR >60 ml/min/1.73m <sup>2</sup> ) (REF)                     | 1.00                            |
| CKD stage 3 (eGFR 30-60 ml/min/1.73m <sup>2</sup> )                    | 1.71 (1.32-2.21)                |
| CKD stages 4 or 5 (eGFR <30 ml/min/1.73m <sup>2</sup> )                | 5.98 (4.13-8.67)                |
| Coronary Artery Disease                                                | 0.84 (0.60-1.18)                |
| Congestive Heart Failure                                               | 1.17 (0.81-1.70)                |
| Active Malignancy                                                      | 1.10 (0.69-1.77)                |
| ≤3 days from Hospital Admission to ICU Admission                       | 0.79 (0.62-1.01)                |
| Lymphocyte Count <1,000 per mm <sup>3</sup> on ICU Day 1               | 1.07 (0.83-1.38)                |
| Hypoxemia, ICU Day 1                                                   |                                 |
| Not Receiving Mechanical Ventilation (REF)                             | 1.00                            |
| Mechanically ventilated and PaO <sub>2</sub> :FiO <sub>2</sub> ≥200    | 1.18 (0.78-1.79)                |
| Mechanically ventilated and PaO <sub>2</sub> :FiO <sub>2</sub> 100-199 | 1.94 (1.45-2.60)                |
| Mechanically ventilated and PaO <sub>2</sub> :FiO <sub>2</sub> <100    | 3.13 (2.34-4.18)                |
| Shock on ICU Day 1                                                     | 1.01 (0.72-1.42)                |
| Altered Mental Status, ICU Day 1                                       | 0.66 (0.50-0.87)                |
| Secondary Infection, ICU Day 1                                         | 1.10 (0.85-1.42)                |
| Coagulation Component of SOFA Score                                    |                                 |
| 0 (REF)                                                                | 1.00                            |
| 1                                                                      | 1.05 (0.79-1.41)                |
| 2-4                                                                    | 1.33 (0.85-2.06)                |
| Liver Component of SOFA Score                                          |                                 |
| 0 (REF)                                                                | 1.00                            |
| 1                                                                      | 0.96 (0.55-1.69)                |
| 2-4                                                                    | 1.22 (0.85-1.74)                |
| D-dimer (ng/ml) on ICU Day 1                                           |                                 |
| <1000 (REF)                                                            | 1.00                            |
| 1000-2500                                                              | 0.99 (0.69-1.41)                |
| >2500                                                                  | 1.54 (1.10-2.16)                |
| Hospital Size (no. of ICU beds)                                        |                                 |
| Large (≥100 ICU beds) (REF)                                            | 1.00                            |
| Medium (50-99 ICU beds)                                                | 0.88 (0.66-1.18)                |
| Small (<50 ICU beds)                                                   | 1.22 (0.92-1.62)                |
| Regional Density of COVID-19                                           |                                 |
| 1 (REF)                                                                | 1.00                            |
| 2                                                                      | 1.15 (0.76-1.73)                |
| 3                                                                      | 0.73 (0.50-1.07)                |
| 4                                                                      | 0.73 (0.50-1.05)                |

Abbreviations: CKD, chronic kidney disease; COVID-19, coronavirus disease 2019; eGFR, estimated glomerular filtration rate; ICU, intensive care unit; PaO<sub>2</sub>:FiO<sub>2</sub>, the ratio of the partial pressure of arterial oxygen over the fraction of inspired oxygen; SOFA, Sequential Organ Failure Assessment.

**Supplemental Table 8: Multivariable Model for AKI-RRT Among Patients who Survived 14 Days.**  
N=2307. No. events=413.

| Variable                                                               | Odds Ratio (95% CI)<br>for AKI-RRT |
|------------------------------------------------------------------------|------------------------------------|
| Age (yrs)                                                              |                                    |
| 18-39 (REF)                                                            | 1.00                               |
| 40-49                                                                  | 1.23 (0.71-2.13)                   |
| 50-59                                                                  | 1.64 (0.98-2.74)                   |
| 60-69                                                                  | 1.97 (1.18-3.30)                   |
| 70-79                                                                  | 1.46 (0.83-2.58)                   |
| ≥80                                                                    | 0.69 (0.29-1.62)                   |
| Male Sex                                                               | 2.44 (1.83-3.25)                   |
| Non-White Race                                                         | 1.77 (1.36-2.31)                   |
| Hypertension                                                           | 1.21 (0.91-1.61)                   |
| Diabetes Mellitus                                                      | 1.68 (1.30-2.17)                   |
| Body Mass Index (kg/m <sup>2</sup> )                                   |                                    |
| <25 (REF)                                                              | 1.00                               |
| 25-29.9                                                                | 1.70 (1.08-2.66)                   |
| 30-34.9                                                                | 1.91 (1.21-3.03)                   |
| 35-39.9                                                                | 2.83 (1.70-4.71)                   |
| ≥40                                                                    | 3.50 (2.11-5.82)                   |
| Chronic Kidney Disease                                                 |                                    |
| No CKD (eGFR >60 ml/min/1.73m <sup>2</sup> ) (REF)                     | 1.00                               |
| CKD stage 3 (eGFR 30-60 ml/min/1.73m <sup>2</sup> )                    | 1.92 (1.41-2.58)                   |
| CKD stages 4 or 5 (eGFR <30 ml/min/1.73m <sup>2</sup> )                | 9.04 (5.83-14.02)                  |
| Coronary Artery Disease                                                | 1.03 (0.70-1.53)                   |
| Congestive Heart Failure                                               | 1.30 (0.84-2.03)                   |
| Active Malignancy                                                      | 1.02 (0.55-1.87)                   |
| ≤3 days from Hospital Admission to ICU Admission                       | 0.79 (0.60-1.04)                   |
| Lymphocyte Count <1,000 per mm <sup>3</sup> on ICU Day 1               | 0.93 (0.70-1.24)                   |
| Hypoxemia, ICU Day 1                                                   |                                    |
| Not Receiving Mechanical Ventilation (REF)                             | 1.00                               |
| Mechanically ventilated and PaO <sub>2</sub> :FiO <sub>2</sub> ≥200    | 1.17 (0.73-1.88)                   |
| Mechanically ventilated and PaO <sub>2</sub> :FiO <sub>2</sub> 100–199 | 1.88 (1.35-2.62)                   |
| Mechanically ventilated and PaO <sub>2</sub> :FiO <sub>2</sub> <100    | 3.69 (2.63-5.16)                   |
| Shock on ICU Day 1                                                     | 1.16 (0.78-1.71)                   |
| Altered Mental Status, ICU Day 1                                       | 0.67 (0.47-0.95)                   |
| Secondary Infection, ICU Day 1                                         | 1.11 (0.82-1.49)                   |
| Coagulation Component of SOFA Score                                    |                                    |
| 0 (REF)                                                                | 1.00                               |
| 1                                                                      | 1.29 (0.92-1.79)                   |
| 2-4                                                                    | 1.71 (0.99-2.95)                   |
| Liver Component of SOFA Score                                          |                                    |
| 0 (REF)                                                                | 1.00                               |
| 1                                                                      | 0.90 (0.45-1.82)                   |
| 2-4                                                                    | 0.96 (0.63-1.45)                   |
| D-dimer (ng/ml) on ICU Day 1                                           |                                    |
| <1000 (REF)                                                            | 1.00                               |
| 1000-2500                                                              | 1.00 (0.67-1.50)                   |
| >2500                                                                  | 1.86 (1.28-2.70)                   |
| Hospital Size (no. of ICU beds)                                        |                                    |
| Large (≥100 ICU beds) (REF)                                            | 1.00                               |
| Medium (50–99 ICU beds)                                                | 0.71 (0.52-0.97)                   |
| Small (<50 ICU beds)                                                   | 1.00 (0.73-1.38)                   |
| Regional Density of COVID-19                                           |                                    |
| 1 (REF)                                                                | 1.00                               |
| 2                                                                      | 1.00 (0.65-1.54)                   |
| 3                                                                      | 0.67 (0.44-1.01)                   |
| 4                                                                      | 0.76 (0.51-1.15)                   |

Abbreviations: CKD, chronic kidney disease; COVID-19, coronavirus disease 2019; eGFR, estimated glomerular filtration rate; ICU, intensive care unit; PaO<sub>2</sub>:FiO<sub>2</sub>, the ratio of the partial pressure of arterial oxygen over the fraction of inspired oxygen; SOFA, Sequential Organ Failure Assessment.

**Supplemental Table 9. Multivariable Model for 28-Day Mortality from the Day of RRT Initiation.**

| Variable                                                               | Odds Ratio (95% CI)<br>for 28-Day Mortality |
|------------------------------------------------------------------------|---------------------------------------------|
| Age (yrs)                                                              |                                             |
| 18-39 (REF)                                                            | 1.00                                        |
| 40-49                                                                  | 1.25 (0.51-3.10)                            |
| 50-59                                                                  | 1.33 (0.57-3.07)                            |
| 60-69                                                                  | 2.45 (1.05-5.76)                            |
| 70-79                                                                  | 3.44 (1.36-8.67)                            |
| ≥80                                                                    | 6.56 (1.61-26.70)                           |
| Male Sex                                                               | 1.31 (0.84-2.04)                            |
| Non-White Race                                                         | 1.08 (0.69-1.69)                            |
| Hypertension                                                           | 0.89 (0.55-1.42)                            |
| Diabetes Mellitus                                                      | 1.09 (0.72-1.64)                            |
| Body Mass Index (kg/m <sup>2</sup> )                                   |                                             |
| <25 (REF)                                                              | 1.00                                        |
| 25-29.9                                                                | 0.95 (0.44-2.03)                            |
| 30-34.9                                                                | 1.17 (0.53-2.56)                            |
| 35-39.9                                                                | 0.79 (0.34-1.85)                            |
| ≥40                                                                    | 1.34 (0.60-3.01)                            |
| Chronic Kidney Disease                                                 |                                             |
| No CKD (eGFR >60 ml/min/1.73m <sup>2</sup> ) (REF)                     | 1.00                                        |
| CKD stage 3 (eGFR 30-60 ml/min/1.73m <sup>2</sup> )                    | 0.85 (0.53-1.36)                            |
| CKD stages 4 or 5 (eGFR <30 ml/min/1.73m <sup>2</sup> )                | 0.53 (0.31-0.90)                            |
| Coronary Artery Disease                                                | 1.43 (0.78-2.63)                            |
| Congestive Heart Failure                                               | 1.39 (0.73-2.63)                            |
| Active Malignancy                                                      | 3.67 (1.25-10.76)                           |
| ≤3 days from Hospital Admission to ICU Admission                       | 0.92 (0.60-1.40)                            |
| Lymphocyte Count <1,000 per mm <sup>3</sup>                            | 0.85 (0.52-1.38)                            |
| PaO <sub>2</sub> :FiO <sub>2</sub>                                     |                                             |
| Not Receiving Mechanical Ventilation (REF)                             | 1.00                                        |
| Mechanically ventilated and PaO <sub>2</sub> :FiO <sub>2</sub> ≥200    | 0.68 (0.36-1.29)                            |
| Mechanically ventilated and PaO <sub>2</sub> :FiO <sub>2</sub> 100-199 | 0.79 (0.45-1.37)                            |
| Mechanically ventilated and PaO <sub>2</sub> :FiO <sub>2</sub> <100    | 1.57 (0.83-2.99)                            |
| Vasopressors                                                           |                                             |
| 0 (REF)                                                                | 1.00                                        |
| 1                                                                      | 1.42 (0.88-2.30)                            |
| ≥2                                                                     | 2.35 (1.33-4.15)                            |
| Altered Mental Status on ICU Day 1                                     | 1.51 (0.91-2.49)                            |
| Secondary Infection on ICU Day 1                                       | 0.82 (0.52-1.30)                            |
| Coagulation Component of SOFA Score                                    |                                             |
| 0 (REF)                                                                | 1.00                                        |
| 1                                                                      | 1.30 (0.68-2.45)                            |
| 2-4                                                                    | 2.04 (0.77-5.41)                            |
| Liver Component of SOFA Score                                          |                                             |
| 0 (REF)                                                                | 1.00                                        |
| 1                                                                      | 0.98 (0.52-1.85)                            |
| 2-4                                                                    | 1.20 (0.59-2.45)                            |
| Urine Output (ml/day)                                                  |                                             |
| >500 (REF)                                                             | 1.00                                        |
| 100-500                                                                | 1.22 (0.75-1.98)                            |
| <100                                                                   | 2.13 (1.25-3.61)                            |
| Initial RRT Modality                                                   |                                             |
| Intermittent Hemodialysis (REF)                                        | 1.00                                        |
| CRRT for 12-24 hours/day                                               | 1.28 (0.77-2.11)                            |
| Hospital Size (no. of ICU beds)                                        |                                             |
| Large (≥100 ICU beds) (REF)                                            | 1.00                                        |
| Medium (50-99 ICU beds)                                                | 3.59 (2.15-6.01)                            |
| Small (<50 ICU beds)                                                   | 7.48 (4.37-12.83)                           |
| Regional Density of COVID-19                                           |                                             |
| 1 (REF)                                                                | 1.00                                        |
| 2                                                                      | 1.66 (0.81-3.43)                            |
| 3                                                                      | 1.06 (0.53-2.11)                            |
| 4                                                                      | 1.83 (0.89-3.73)                            |

Abbreviations: CKD, chronic kidney disease; COVID-19, coronavirus disease 2019; CRRT, continuous renal replacement therapy; eGFR, estimated glomerular filtration rate; ICU, intensive care unit; PaO<sub>2</sub>:FiO<sub>2</sub>, the ratio of the partial pressure of arterial oxygen over the fraction of inspired oxygen; RRT, renal replacement therapy; SOFA, Sequential Organ Failure Assessment. Of n=637 patients initiated on RRT, 365 had died (57.3%), 91 had been discharged (14.3%), and 181 remained hospitalized (28.4%) 28 days following the day of RRT initiation.

**Supplemental Table 10. AKI by Stage and 28-Day Mortality Among Patients with a Pre-Hospital Baseline SCr Available.** n=1367

| <b>AKI Stage</b>          | <b>N (%)</b> | <b>Death at 28 days, N (%)</b> |
|---------------------------|--------------|--------------------------------|
| No AKI                    | 522 (38.2)   | 107 (20.5)                     |
| AKI Stage 1               | 183 (13.4)   | 61 (33.3)                      |
| AKI Stage 2               | 185 (13.5)   | 90 (48.7)                      |
| AKI Stage 3 (without RRT) | 195 (14.3)   | 121 (62.1)                     |
| AKI-RRT                   | 282 (20.6)   | 153 (54.3)                     |

Abbreviations: AKI, acute kidney injury; RRT, renal replacement therapy.

**Supplemental Figure 1. Number of Patients with AKI-RRT by State among Contributing Sites.** Red bubbles demonstrate the number of patients contributed by each site.

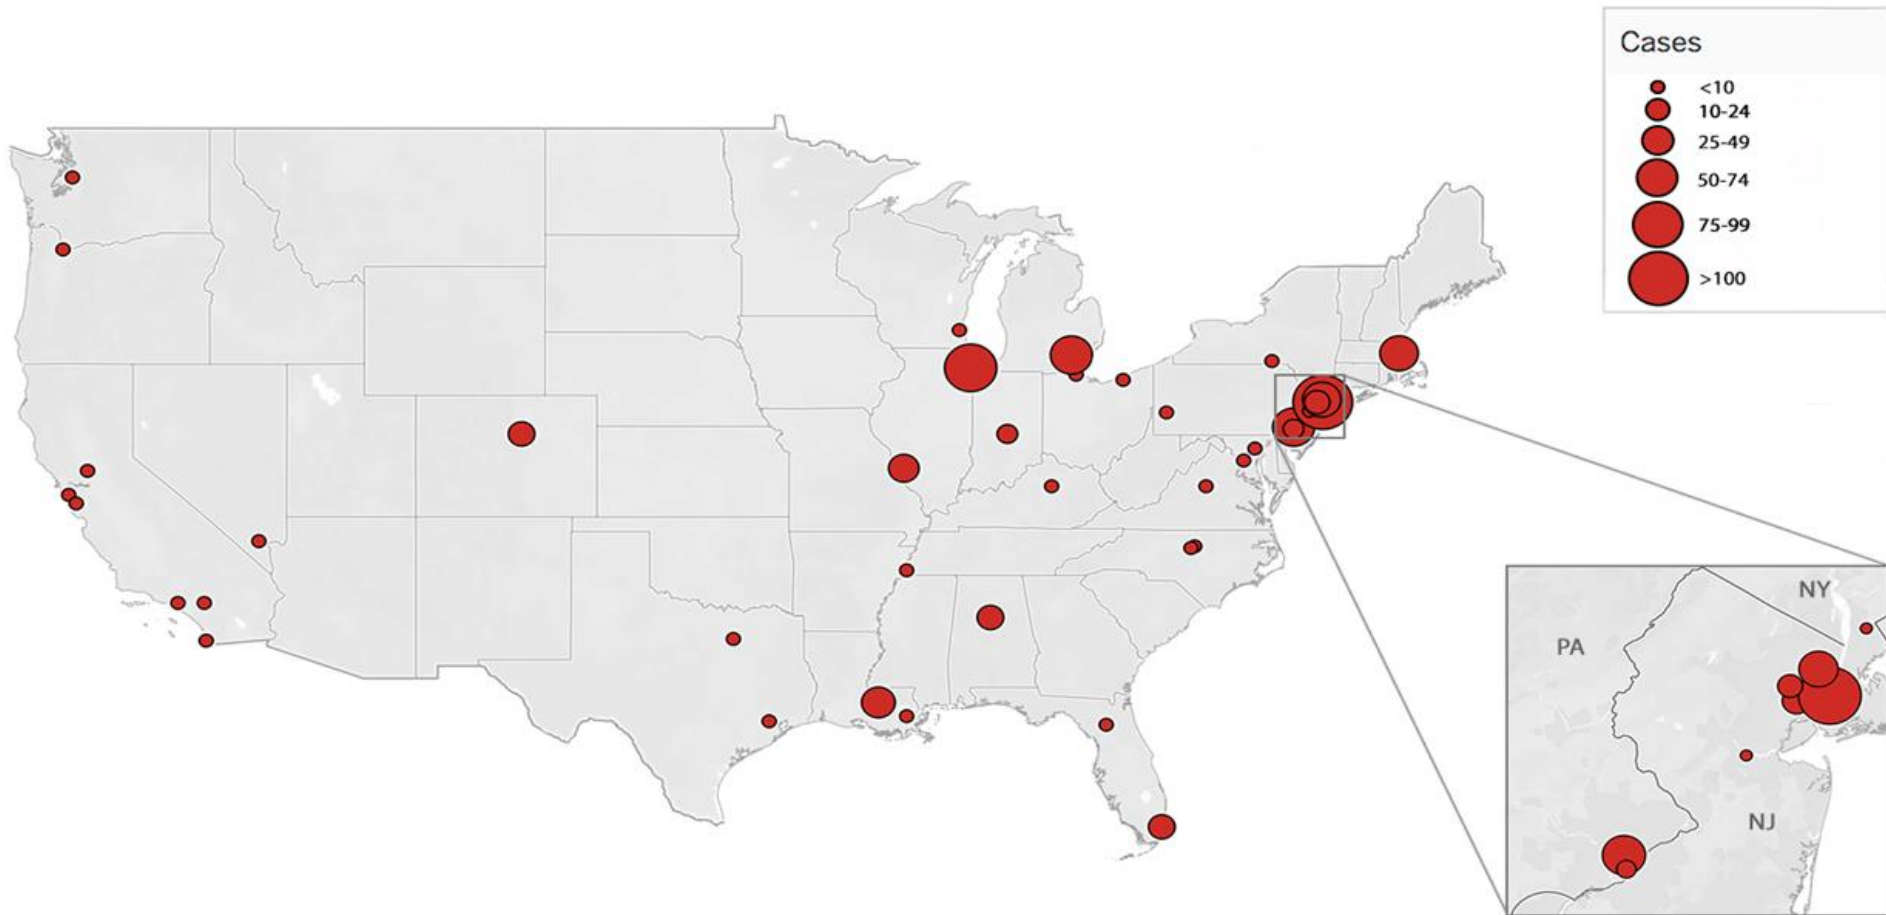

**Supplemental Figure 2. Time to AKI-RRT.** Total n=637. The median time from ICU admission to RRT initiation was 4 days (interquartile range, 2 to 7 days). Abbreviations: ICU, intensive care unit.

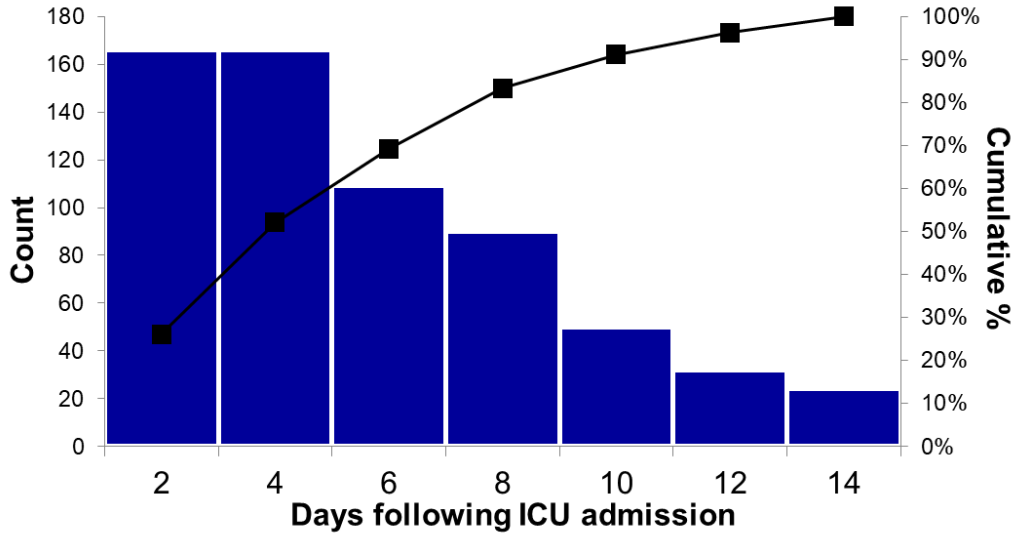

**Supplemental Figure 3. Timing of AKI-RRT in Relation to Intubation.** N=625 of 637 (98.1%) AKI-RRT patients received mechanical ventilation, of whom 3 (0.5%) had AKI-RRT prior to intubation.

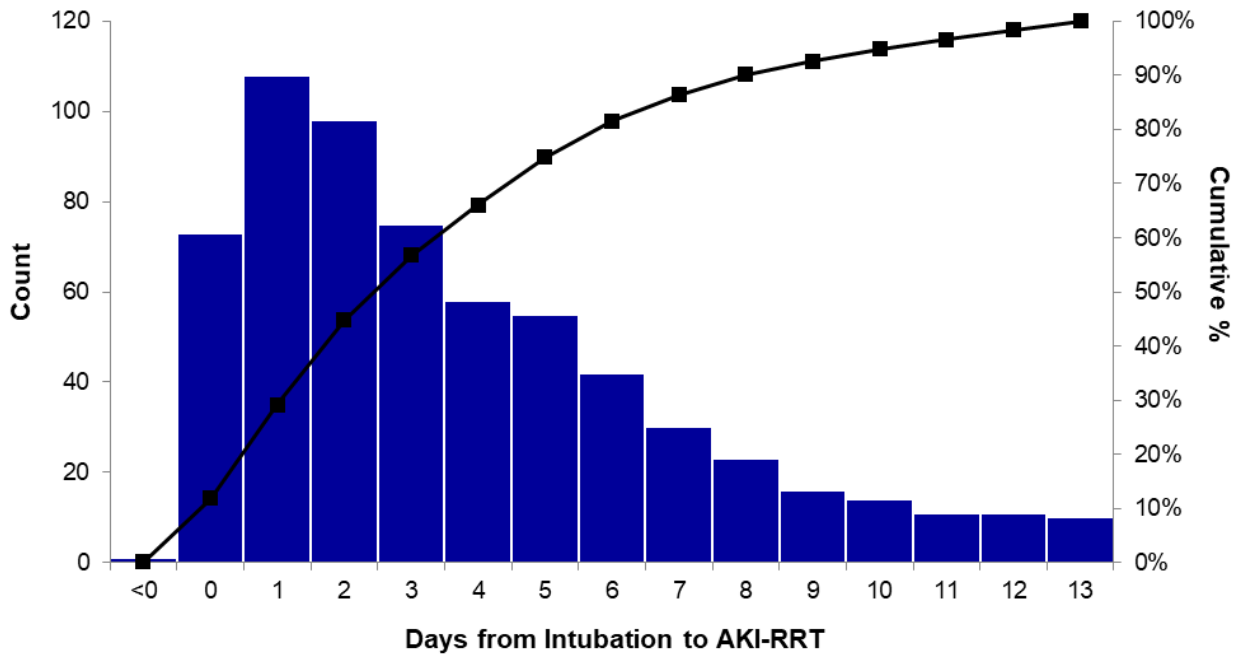

**Supplemental Figure 4. Proportion of Patients with AKI Stage 3 Treated with RRT by Quartile of Regional Density of COVID-19.** Abbreviations: AKI, acute kidney injury; RRT, renal replacement therapy

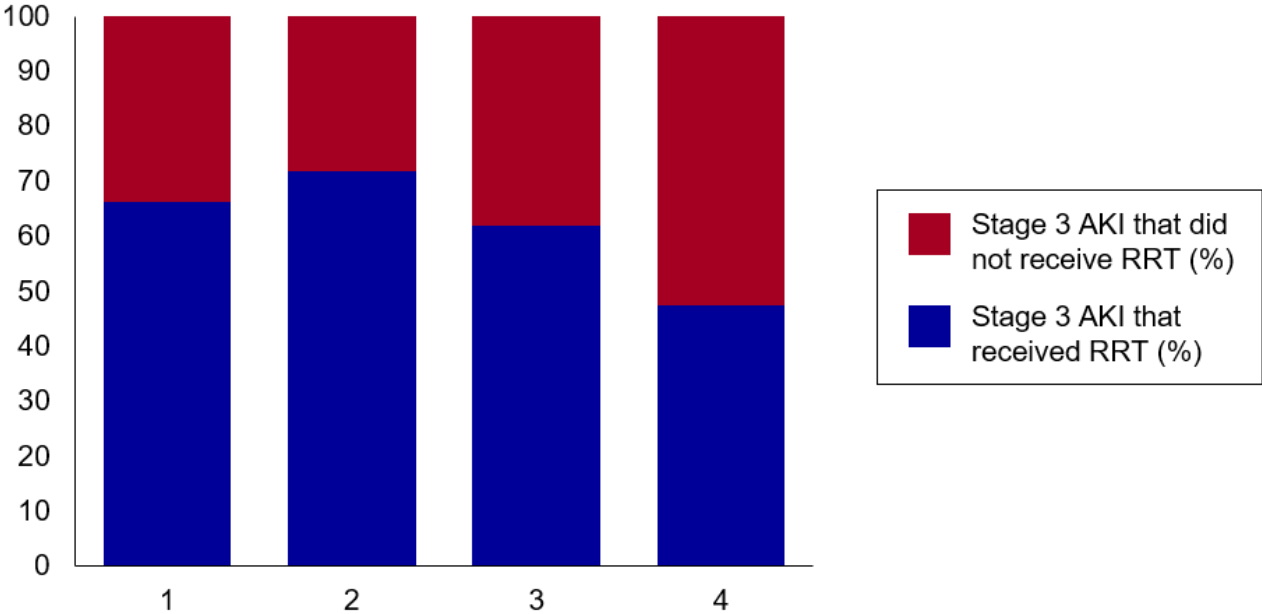



**Supplemental Figure 5. 28-Day Mortality of Patients with AKI-RRT by Region.** Comorbidities include diabetes mellitus, hypertension, coronary artery disease, congestive heart failure, atrial fibrillation or flutter, chronic obstructive pulmonary disease, asthma, other lung disease, chronic liver disease, HIV or AIDS, active malignancy, prior solid organ transplantation, prior bone marrow transplantation, and other immunodeficiency. Hospitals were categorized as having a regional density of COVID-19 category of 1, 2, 3, or 4, with 4 constituting the highest regional density (see Supplemental Methods for further details). Abbreviations: ICU, intensive care unit; MV, mechanical ventilation.

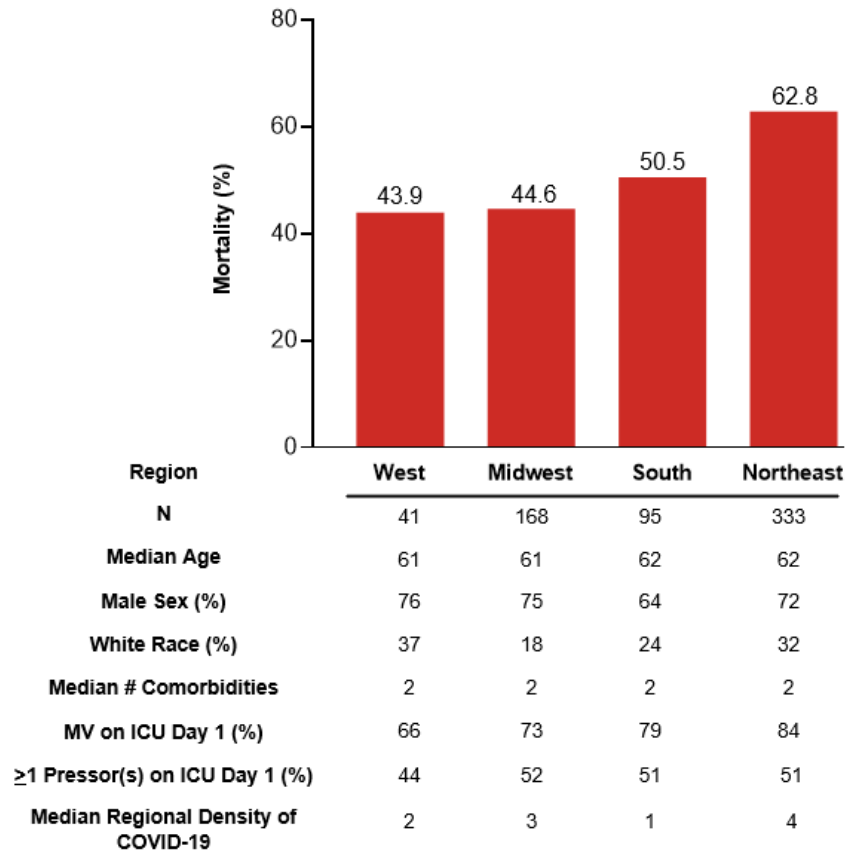

**Supplemental Figure 6. AKI on Hospital Admission and within 14 Days following ICU Admission.**

Panel A shows incidence and stage of AKI on hospital admission among those with a pre-hospital baseline serum creatinine available (n=1367), and the association with 28-day mortality. Panel B shows AKI incidence and stage in the 14 days following ICU admission (n=3099), and the association with 28-day mortality. Note that stage 3 AKI does not include RRT (stage 3 AKI and AKI-RRT are thus mutually exclusive categories). Abbreviations: AKI-RRT (renal replacement therapy-treated acute kidney injury)

**A. AKI on Hospital Admission**

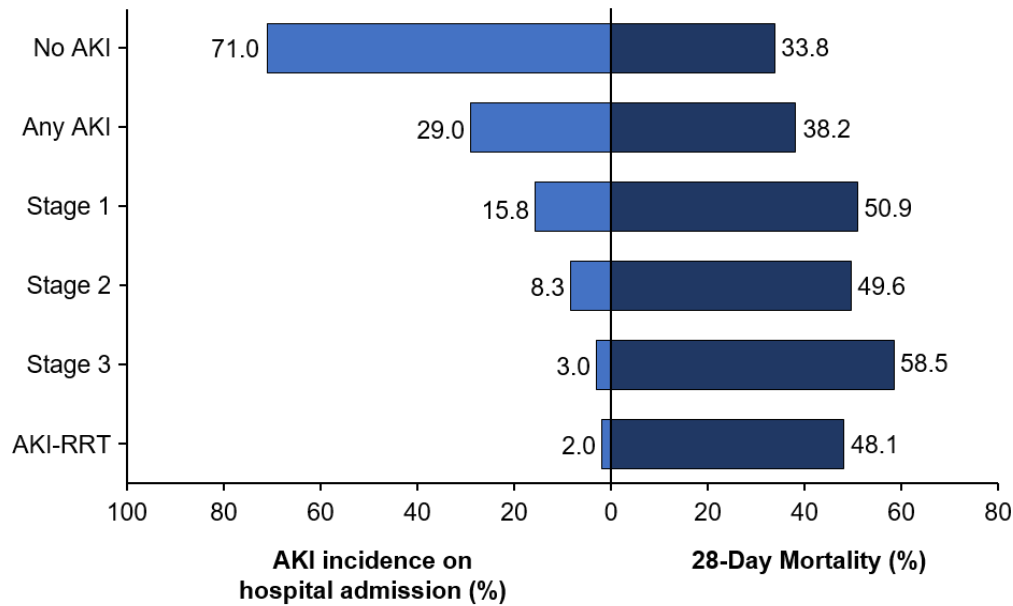

**B. AKI within 14 days following ICU admission**

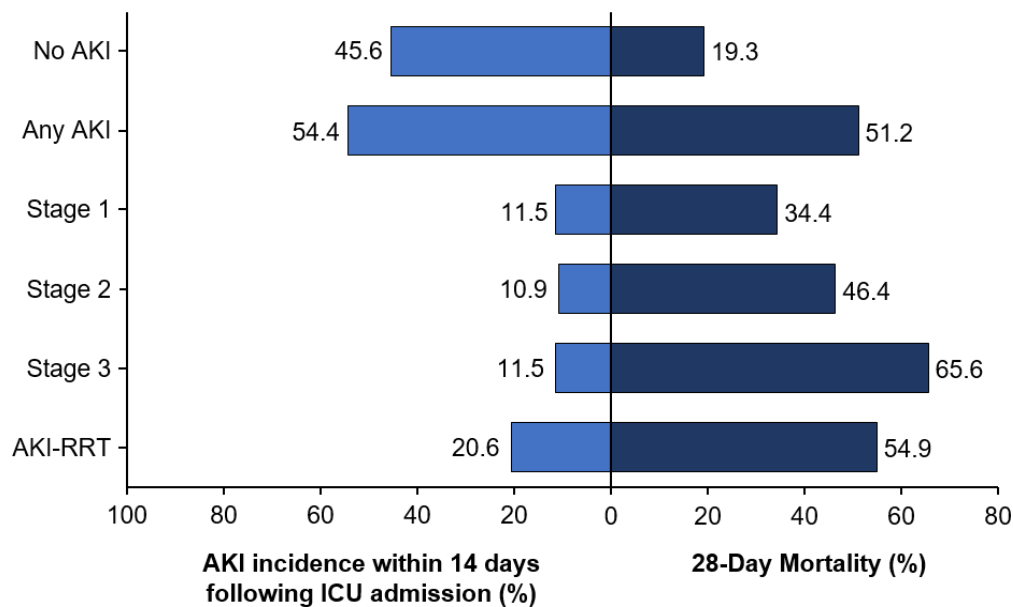

**Supplemental Figure 7: Flowchart of Outcomes of Patients without AKI-RRT.** Abbreviations: AKI, acute kidney injury; RRT, renal replacement therapy.

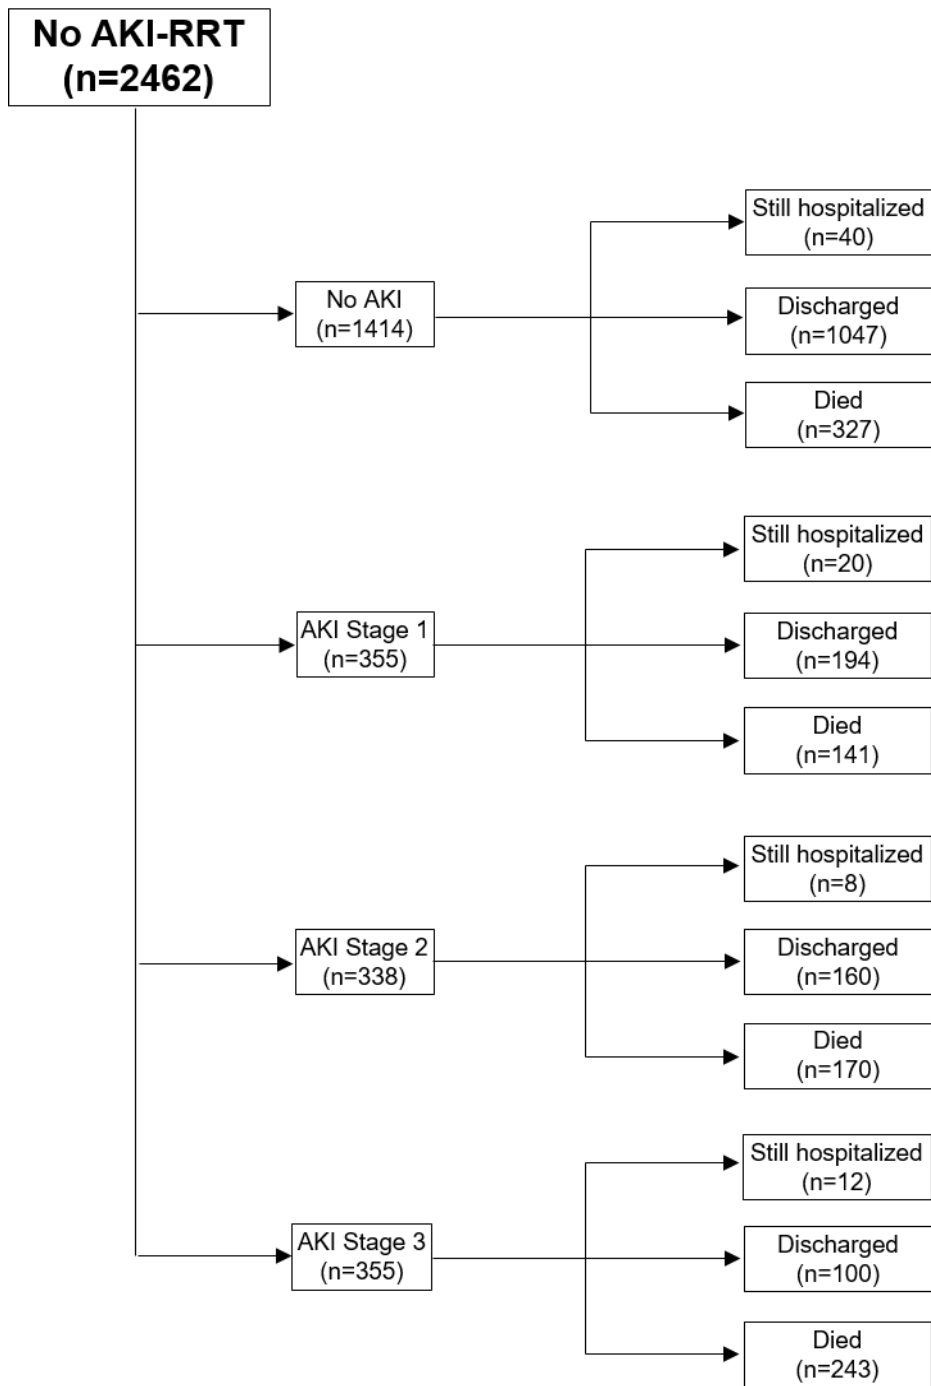

**ACKNOWLEDGEMENT OF PATIENT OVERLAP**

Of the 3099 patients in this study, 153 were reported in a study of AKI among patients hospitalized with COVID-19 within the Mount Sinai Health System in New York City (Chan et al., *J Am Soc Nephrol*, in press), and 29 were reported in a single-center study of AKI in hospitalized patients in New Orleans (Mohamed et al., *Kidney360*, 2020). Additionally, 58 patients from the current study were reported in a single-center case series from New York City (Goyal et al., *N Engl J Med*, 2020) and 12 patients were reported in a case series of critically ill patients from the Seattle region (Bhatraju et al., *N Engl J Med*, 2020), neither of which was focused on AKI. Finally, 2215 patients from the current study were reported in the primary STOP-COVID publication: a multicenter cohort study that examined risk factors for death among critically ill patients with COVID-19 (Gupta et al., *JAMA Intern Med*, 2020).
